# Supplementary material for: Total synthesis and stereochemical assignment of rakicidin F
Source: Royal Society of Chemistry journal article supplement (doi:10.1039/d2ob00692h), 2022-01-01
Supplement: d2ob00692h1.pdf [file d2ob00692h1.pdf]

# Supporting Information

## Total Synthesis and Stereochemical Assignment of Rakicidin F

Fangzhi Han,<sup>‡a</sup> Guangju Liu,<sup>‡a</sup> Xiuhe Zhao,<sup>a</sup> Shunshun Du,<sup>a</sup> Yahui Ding,<sup>b</sup> Quan Zhang,<sup>a</sup> Huiting Deng,<sup>c</sup> Liang Wang\*<sup>b</sup> and Yue Chen<sup>b</sup>

<sup>a</sup> The State Key Laboratory of Medicinal Chemical Biology, College of Pharmacy, Nankai University, Tianjin, 300350, People's Republic of China.

<sup>b</sup> College of Chemistry, Nankai University, Tianjin, 300071, People's Republic of China.

<sup>c</sup> Nankai University, Tianjin Third Central Hospital affiliated to Nankai University, Tianjin Key Laboratory of Extracorporeal Life Support for Critical Diseases, Institute of Hepatobiliary Disease, Tianjin, 300170, People's Republic of China.

### Corresponding Author

E-mail: lwang@nankai.edu.cn (L.W.)

### Author Contributions

<sup>‡</sup> F.H. and G.L. contributed equally to this work.

### Table of Contents

|                                                                                   |     |
|-----------------------------------------------------------------------------------|-----|
| <b>1. General Information</b> .....                                               | S1  |
| <b>2. Hypothetic Routes of Rakicidin F Macrocyclized at Different Sites</b> ..... | S2  |
| <b>3. Synthesis of Compounds</b> .....                                            | S5  |
| <b>4. Data Comparison of Synthesized and Natural Rakicidin F</b> .....            | S20 |
| <b>5. Copies of NMR Spectrum</b> .....                                            | S23 |
| <b>6. Copies of IR and HRMS Spectrum for Rakicidin F</b> .....                    | S46 |

## 1. General Information

High-resolution mass spectra (HRMS) were obtained with a Thermo Scientific™ Q Exactive Focus mass spectrometer (Orbitrap spec). IR spectra were recorded on a Bruker Tensor 27 instrument. Optical rotations were recorded on an Insmark IP 120 digital polarimeter. Elemental analysis data was obtained with a CHONS Elemental Analyzer (Vario EL cube).

<sup>1</sup>H NMR spectra were recorded on a Bruker AV 400 spectrometer (400 MHz) using CDCl<sub>3</sub>, MeOD-*d*<sub>4</sub> or DMSO-*d*<sub>6</sub> as the solvents. Chemical shifts are reported in parts per million (ppm) relative to either a tetramethylsilane internal standard or solvent signals. Data are reported as follows: chemical shift, multiplicity (s = singlet, d = doublet, t = triplet, q = quartet, br = broad, h = heplet, m = multiplet), coupling constants and integration. <sup>13</sup>C NMR spectra were recorded on a Bruker AV 400 spectrometer (100 MHz) using CDCl<sub>3</sub>, MeOD-*d*<sub>4</sub> or DMSO-*d*<sub>6</sub> as the solvents. Chemical shifts ( $\delta$ ) are reported in ppm measured relative to the solvent peak.

HPLC level solvent such as tetrahydrofuran (THF), dimethylformamide (DMF) and dichloromethane (DCM) were purified by solvent purification system (Innovative Technology) and stored with 4 Å molecular sieves under an argon atmosphere. Reagents were purchased from Experimental Reagents and Technology Management Platform of Nankai University without further purification, unless otherwise stated. Yields refer to chromatographically unless otherwise stated. Silica gel (200 – 300 or 100 – 200 mesh) and TLC plates were bought from Shanghai Haohong Scientific Co., Ltd.

## 2. Hypothetic Routes of Rakicidin F Macrocyclized at Different Sites

### 1) Macrocyclization at D site (17 LLS)

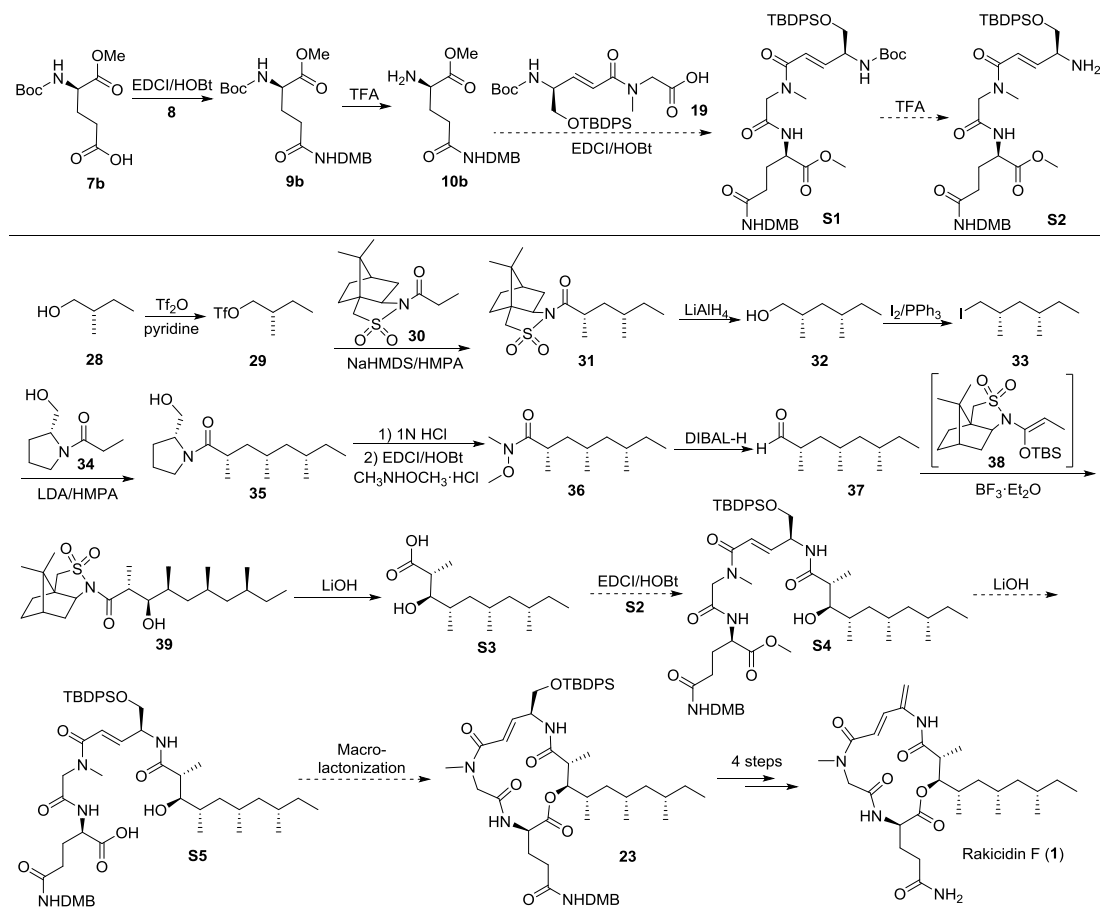

### 2) Macrocyclization at E site (19 LLS)

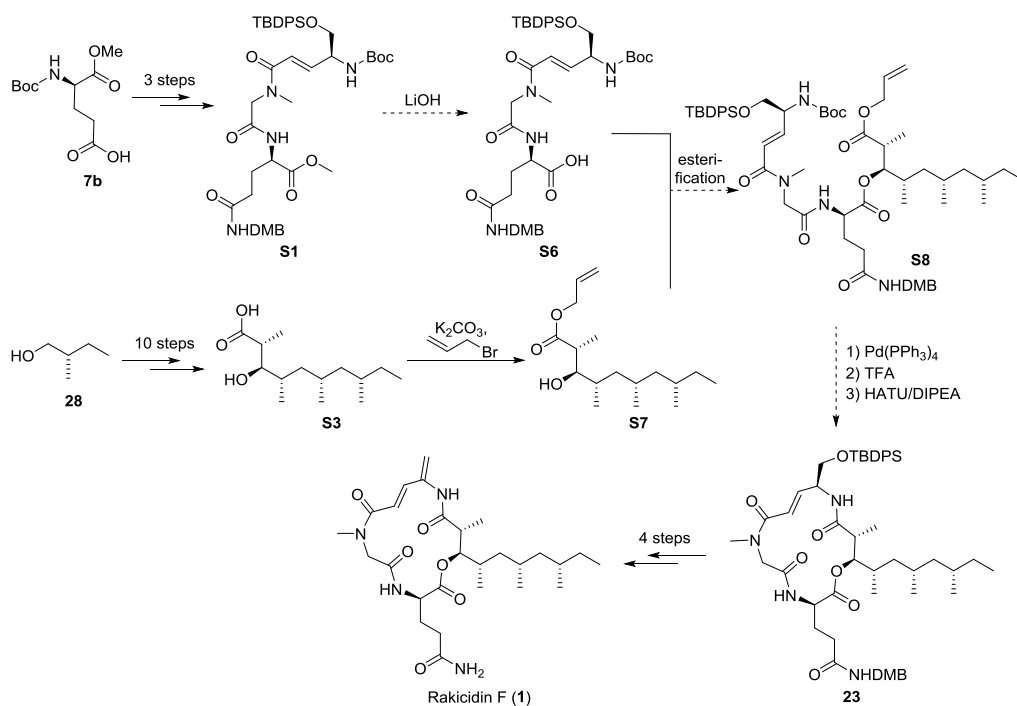



## 5) Macrocyclization at B site (20 LLS)

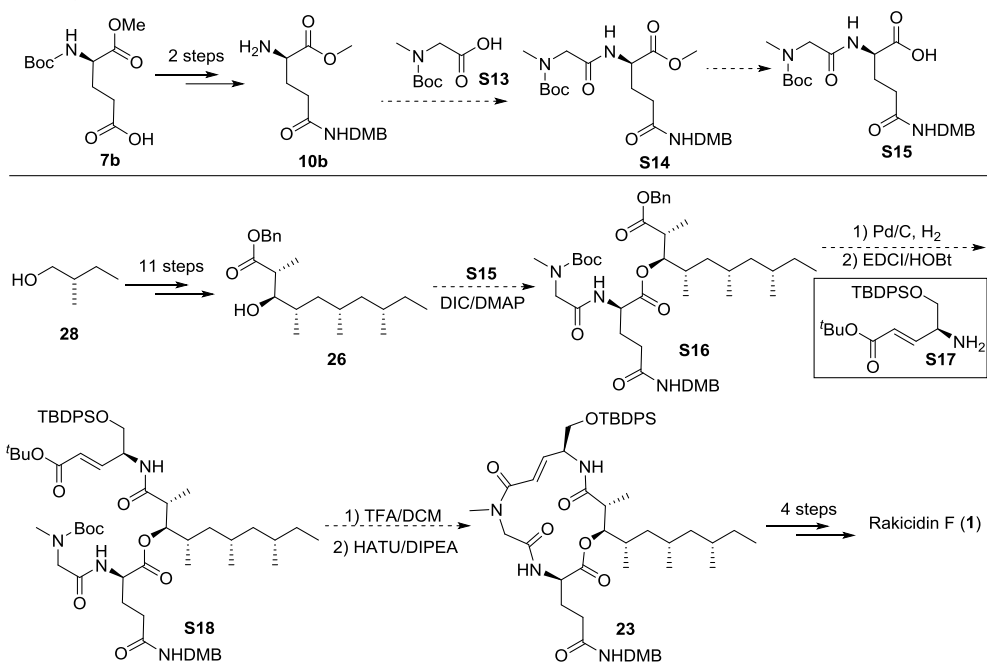

**Table S1 Comparison of the five different macrocyclization sites of rakicidin F**

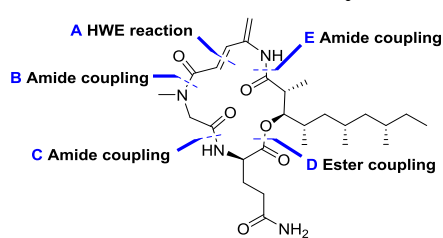

| Macrocyclization site | Estimated longest linear sequence (LLS) | Estimated total steps from commercial materials | Comparison                                                                |
|-----------------------|-----------------------------------------|-------------------------------------------------|---------------------------------------------------------------------------|
| A                     | 22                                      | 28                                              | the longest LLS and epimerization might occur during the macrocyclization |
| B                     | 20                                      | 27                                              | secondary amine of <b>S18</b> was not suitable for macrocyclization       |
| C                     | 20                                      | 27                                              | reported macrocyclization site                                            |
| D                     | 17                                      | 27                                              | the shortest LLS and without any report                                   |
| E                     | 19                                      | 29                                              | the second short LLS and without any report                               |

### 3. Synthesis of Compounds

#### Preparation of **9a**.

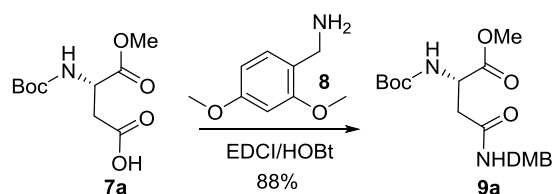

To a solution of **7a** (3.85 g, 15.61 mmol) and **8** (3.13 g, 18.73 mmol) in DCM (150 mL) was added EDCI (3.59 g, 18.73 mmol) and HOBt (2.32 g, 17.17 mmol) at room temperature (r.t.). The reaction mixture was stirred for 12 h, then quenched with 5% NaHSO<sub>4</sub> (200 mL) and separated. The aqueous phase was extracted with ethyl acetate (2 × 100 mL). The combined organic phases were washed with brine (100 mL), dried (Na<sub>2</sub>SO<sub>4</sub>) and concentrated under reduced pressure to obtain **9a** (5.45 g, 88%) as a white solid. Melting point: 76 – 79 °C;  $[\alpha]_D^{15} = +11.0$  ( $c = 1.0$ , CHCl<sub>3</sub>); <sup>1</sup>H NMR (400 MHz, CDCl<sub>3</sub>) δ 7.12 (d,  $J = 8.2$  Hz, 1H), 6.47 – 6.35 (m, 2H), 6.04 (t,  $J = 5.6$  Hz, 1H), 5.77 (d,  $J = 8.5$  Hz, 1H), 4.47 (dt,  $J = 9.1, 4.5$  Hz, 1H), 4.39 – 4.22 (m, 2H), 3.80 (s, 3H), 3.78 (s, 3H), 3.69 (s, 3H), 2.86 (dd,  $J = 15.6, 4.6$  Hz, 1H), 2.63 (dd,  $J = 15.6, 4.5$  Hz, 1H), 1.41 (s, 9H); <sup>13</sup>C NMR (100 MHz, CDCl<sub>3</sub>) δ 172.1, 169.4, 160.7, 158.7, 155.8, 130.6, 118.6, 104.1, 98.7, 79.9, 55.5, 55.5, 52.6, 50.6, 39.1, 38.0, 28.4;  $\nu_{\max}$  (neat): 3333, 2975, 2839, 1714, 1654, 1615, 1508, 1461, 1291, 1209, 1163, 1037, 834, 736 cm<sup>-1</sup>; HRMS (ESI)  $m/z$  calcd for C<sub>19</sub>H<sub>29</sub>N<sub>2</sub>O<sub>7</sub><sup>+</sup> [M + H]<sup>+</sup>: 397.1970, found: 397.1973.

#### Preparation of **12**.

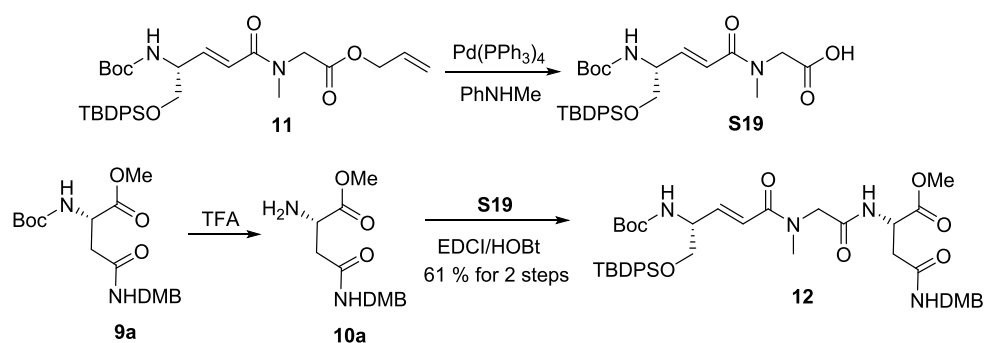

To a solution of compound **9a** (1.6 g, 4.10 mmol) in DCM (19 mL) was added TFA (2 mL) dropwisely. The reaction mixture was stirred for 2 h at r.t., diluted with toluene (50 mL) and concentrated under reduced pressure to remove excess TFA. The crude product **10a** was used for the next step directly. To a solution of **11** (2.00 g, 3.45 mmol) in anhydrous THF (34 mL) were added Pd(PPh<sub>3</sub>)<sub>4</sub> (398 mg, 0.35 mmol) and *N*-methylaniline (746 μL, 6.90 mmol). The reaction mixture was stirred for 1 h at r.t., and diluted with ethyl acetate (200 mL). The organic phase was separated and washed by 1 % HCl (2 × 60 mL), dried over Na<sub>2</sub>SO<sub>4</sub> and concentrated under reduced pressure. The residue was purified by column chromatography on silica gel (petroleum ether: ethyl acetate = 20: 1 to 1: 1) to afford acid **S19**. The above-obtained acid **S19** and amine **10a** (4.10 mmol) were dissolved in anhydrous DCM (17 mL). To the mixture, HOBt (513 mg, 3.80 mmol) and EDCI (749 mg, 3.80 mmol) were added successively. The reaction

mixture was stirred for 18 h and the solvent was removed under reduced pressure. The residue was diluted with DCM (100 mL) and washed successively with 1 % HCl, saturated aqueous NaHCO<sub>3</sub>, brine, dried over Na<sub>2</sub>SO<sub>4</sub> and filtrated. The filtrate was concentrated under reduced pressure. The residue was purified by column chromatography on silica gel (petroleum ether: ethyl acetate = 2: 1) to obtain compound **12** (1.72 g, 61 % for 2 steps) as a colorless oil.  $[\alpha]_D^{15} = +21.8$  ( $c = 1.0$ , CHCl<sub>3</sub>); <sup>1</sup>H NMR (400 MHz, CDCl<sub>3</sub>) δ 7.65 – 7.58 (m, 4H), 7.46 – 7.31 (m, 6H), 7.08 (d,  $J = 8.2$  Hz, 1H), 6.80 (dd,  $J = 15.5, 5.3$  Hz, 1H), 6.46 – 6.29 (m, 3H), 4.98 – 4.91 (m, 1H), 4.75 (dt,  $J = 8.2, 4.6$  Hz, 1H), 4.39 (s, 1H), 4.27 (d,  $J = 5.7$  Hz, 2H), 4.09 – 3.93 (m, 2H), 3.74 (d,  $J = 8.1$  Hz, 7H), 3.65 (s, 3H), 3.05 (s, 3H), 2.83 (dd,  $J = 15.7, 4.6$  Hz, 1H), 2.65 (dd,  $J = 16.0, 4.8$  Hz, 1H), 1.42 (s, 9H), 1.03 (s, 9H); <sup>13</sup>C NMR (100 MHz, CDCl<sub>3</sub>) δ 171.3, 169.2, 168.5, 166.8, 160.5, 158.5, 155.2, 143.8, 135.6, 135.5, 133.0, 132.8, 130.3, 129.9, 129.9, 127.8, 127.8, 120.8, 118.5, 104.0, 98.5, 79.6, 65.5, 55.3, 53.6, 52.6, 51.5, 49.1, 38.7, 37.3, 36.6, 28.3, 26.8, 19.2;  $\nu_{\max}$  (neat): 3310, 3070, 2934, 2859, 1745, 1665, 1617, 1510, 1465, 1430, 1395, 1288, 1209, 1163, 1113, 1041, 977, 825, 738, 705, 613, 506 cm<sup>-1</sup>; HRMS (ESI)  $m/z$  calcd for C<sub>43</sub>H<sub>58</sub>N<sub>4</sub>O<sub>10</sub>SiNa<sup>+</sup> [M + Na]<sup>+</sup>: 841.3815, found: 841.3820.

#### Preparation of 4.

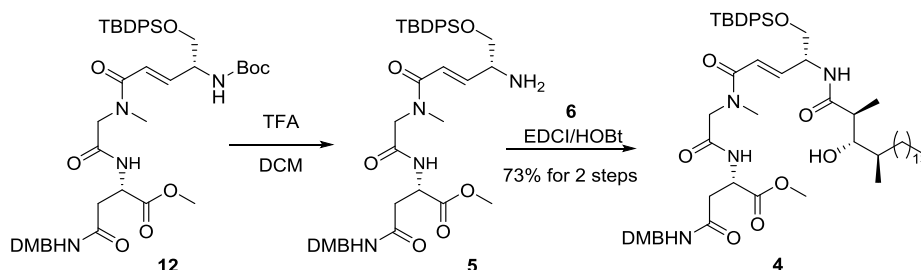

To a solution of compound **12** (1.00 g, 1.22 mmol) in DCM (10 mL) was added TFA (1.5 mL) dropwisely. The reaction mixture was stirred for 2 h at r.t., diluted with toluene (50 mL) and concentrated under reduced pressure to remove excess TFA. The crude product **5** was used for the next step directly. The acid **6** (400 mg, 1.22 mmol) was dissolved in anhydrous DCM (10 mL). To the mixture were added HOBt (181 mg, 1.34 mmol), and EDCI (287 mg, 1.50 mmol). The reaction mixture was stirred for 0.5 h followed by addition of compound **5** (1.22 mmol). The reaction mixture was stirred for another 12 h, quenched with NH<sub>4</sub>Cl (100 mL) and separated. The aqueous phase was extracted with ethyl acetate (2 × 100 mL). The combined organic phases were washed with 5% NaHSO<sub>4</sub> (100 mL), NaHCO<sub>3</sub> (100 mL) and brine (100 mL), dried over Na<sub>2</sub>SO<sub>4</sub>, filtered and concentrated under reduced pressure. The crude was purified by column chromatography on silica gel (petroleum ether: ethyl acetate = 1 : 1) to obtain compound **4** (955 mg, 73% for 2 steps) as a yellow oil.  $[\alpha]_D^{15} = +22.9$  ( $c = 2.0$ , CHCl<sub>3</sub>); <sup>1</sup>H NMR (400 MHz, CDCl<sub>3</sub>) δ 7.69 – 7.56 (m, 4H), 7.48 – 7.34 (m, 6H), 7.31 (t,  $J = 5.1$  Hz, 1H), 7.12 (d,  $J = 8.1$  Hz, 1H), 7.04 (d,  $J = 9.0$  Hz, 1H), 6.68 (dd,  $J = 14.9, 2.9$  Hz, 1H), 6.46 – 6.31 (m, 2H), 6.24 (dd,  $J = 14.8, 2.2$  Hz, 1H), 5.91 (d,  $J = 8.2$  Hz, 1H), 4.84 (dt,  $J = 8.7, 4.1$  Hz, 1H), 4.31 (dd,  $J = 14.3, 5.6$  Hz, 1H), 4.27 – 4.06 (m, 3H), 3.78 (dd,  $J = 15.6, 5.2$  Hz, 2H), 3.75 (s, 3H), 3.72 (s, 3H), 3.68 (s, 3H), 3.65 – 3.50 (m, 3H), 3.11 (s, 2H), 3.06 (s, 1H), 2.89 (dd,  $J = 15.3, 4.0$  Hz, 1H), 2.62 (dd,  $J = 15.3, 4.5$  Hz, 1H), 2.17 – 2.05 (m, 1H), 1.56 (dq,  $J = 13.2, 6.6, 5.8$  Hz, 1H), 1.25 (s, 26H), 1.04 (d,  $J = 5.6$  Hz, 9H), 0.97 (d,  $J = 6.8$  Hz, 3H), 0.87 (t,  $J = 6.7$  Hz, 3H), 0.81 (d,  $J = 6.7$  Hz, 3H); <sup>13</sup>C NMR (100 MHz, CDCl<sub>3</sub>) δ 176.3, 171.3, 169.7, 169.1,





| entry | reaction conditions                   | Solvent | yield/%         |
|-------|---------------------------------------|---------|-----------------|
| 1     | HATU, DMAP                            | THF     | nd <sup>b</sup> |
| 2     | 2,4,6-trichlorobenzoyl chloride, DMAP | Toluene | nd <sup>b</sup> |
| 3     | MYTsA, PTSA H <sub>2</sub> O          | DCM     | nd <sup>b</sup> |

<sup>a</sup> Reaction conditions: compound **13** (10 mg), solvent (10 mL), concentration (1.0 mM). <sup>b</sup> nd = not detected (by TLC analysis). MYTsA = N-methyl ynetoluenesulfonamide; PTSA H<sub>2</sub>O = *p*-toluenesulfonic acid monohydrate.

Entry 1:

The solution of **13** (10 mg, 0.01 mmol) in THF (5 mL) was added to a suspension of HATU (38 mg, 0.10 mmol) and DMAP (14 mg, 0.10 mmol) in 5 mL of THF via a micro syringe pump (1.0 mL/h). The reaction mixture was stirred for another 24 h at r.t.. No compound **3** was detected through TLC analysis.

Entry 2:

To a solution of **13** (10 mg, 0.01 mmol) in toluene (0.5 mL) were added 2,4,6-trichlorobenzoyl chloride (2.6 mg, 0.015 mmol) and TEA (2.0 mg, 0.02 mmol). After stirring under Ar atmosphere at r.t. for 1 h, the reaction mixture was added with 5 mL of toluene. The solution obtained was then added to a suspension of DMAP (14 mg, 0.10 mmol in 4.5 mL of toluene) via a micro syringe pump (1.0 mL/h). The reaction mixture was stirred for another 12 h at r.t.. No compound **3** was detected through TLC analysis.

Entry 3:

To a solution of **13** (10 mg, 0.01 mmol) in DCM (0.5 mL) was added MYTsA (2.3 mg, 0.011 mmol). The reaction mixture was stirred under Ar atmosphere at r.t. overnight. TLC showed compound **13** was consumed out. The reaction mixture was added with 5 mL of DCM. The solution obtained was then added to a suspension of PTSA·H<sub>2</sub>O (0.2 mg in 4.5 mL of DCM) via a micro syringe pump (1.0 mL/h). The reaction mixture was stirred for another 12 h at r.t.. No compound **3** was detected through TLC analysis.

### Preparation of **9b**.

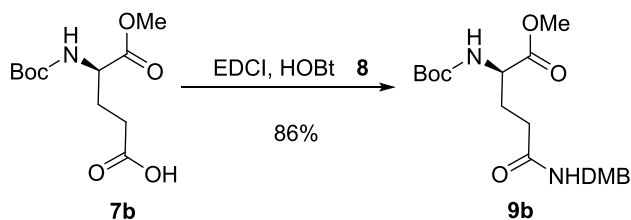

The titled compound **9b** was obtained following the procedure described for **9a**. (1.35 g, 86%) as a white solid. Melting point: 80 – 83 °C;  $[\alpha]_D^{15} = -6.6$  ( $c = 1.0$ , CHCl<sub>3</sub>); <sup>1</sup>H NMR (400 MHz, CDCl<sub>3</sub>) δ 7.14 (d,  $J = 8.1$  Hz, 1H), 6.42 (d,  $J = 2.3$  Hz, 1H), 6.39 (dd,  $J = 8.1, 2.4$  Hz, 1H), 6.28 (s, 1H), 5.39 (d,  $J = 8.2$  Hz, 1H), 4.32 (d,  $J = 5.7$  Hz, 2H), 4.24 (td,  $J = 8.6, 4.4$  Hz, 1H), 3.79 (s, 3H), 3.76 (s, 3H), 3.69 (s, 3H), 2.22 (td,  $J = 7.1, 6.6, 2.4$  Hz, 2H), 2.13 (dtd,  $J = 14.9, 7.5, 7.0, 4.5$  Hz, 1H), 1.98 – 1.85 (m, 1H), 1.40 (s, 9H); <sup>13</sup>C NMR (100 MHz, CDCl<sub>3</sub>) δ 172.9, 171.4, 160.6, 158.6, 155.8, 130.6, 118.9, 104.0, 98.6, 80.0, 55.5, 55.4, 53.2, 52.4, 39.1, 32.7, 28.7, 28.4;  $\nu_{\text{max}}$  (neat): 3316, 2931, 1712, 1510, 1457, 1366, 1289, 1258, 1209, 1162, 1037,

933, 834, 737, 638  $\text{cm}^{-1}$ ; HRMS (ESI)  $m/z$  calcd for  $\text{C}_{20}\text{H}_{31}\text{N}_2\text{O}_7^+$   $[\text{M} + \text{H}]^+$ : 411.2126, found: 411.2128.

### Preparation of 20.

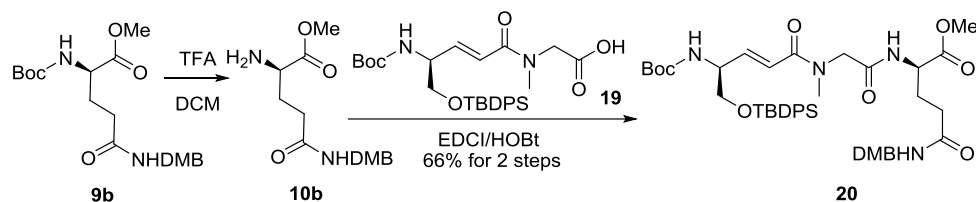

The titled compound **20** was obtained following the procedure described for **12**. The residue was purified by column chromatography on silica gel (petroleum ether: ethyl acetate = 2: 1) to obtain compound **20** (1.32 g, 66% for 2 steps) as a colorless oil.  $[\alpha]_D^{15} = -9.5$  ( $c = 1.0$ ,  $\text{CHCl}_3$ );  $^1\text{H NMR}$  (400 MHz,  $\text{CDCl}_3$ , including rotamer = 3:1)  $\delta$  7.70 – 7.58 (m, 4H), 7.47 – 7.33 (m, 6H), 7.16 (t,  $J = 8.1$  Hz, 2H), 6.81 (dd,  $J = 15.3, 5.6$  Hz, 1H), 6.49 – 6.36 (m, 3H), 6.31 – 6.21 (m, 1H), 5.10 (s, 0.25H), 4.88 (s, 0.75H), 4.49 (d,  $J = 9.3$  Hz, 1H), 4.38 (s, 1H), 4.31 (d,  $J = 5.7$  Hz, 2H), 4.17 (d,  $J = 15.8$  Hz, 1H), 3.94 (d,  $J = 15.6$  Hz, 1H), 3.79 (s, 3H), 3.77 (s, 3H), 3.74 – 3.71 (m, 1H), 3.69 (s, 3H), 3.68 – 3.59 (m, 1H), 3.12 (s, 2.25H), 3.08 (s, 0.75H), 2.21 (p,  $J = 8.2, 6.6$  Hz, 3H), 1.98 (p,  $J = 9.1, 7.9$  Hz, 1H), 1.43 (d,  $J = 5.5$  Hz, 9H), 1.04 (s, 9H);  $^{13}\text{C NMR}$  (100 MHz,  $\text{CDCl}_3$ , including rotamer)  $\delta$  172.2, 171.6, 169.0, 167.0, 160.6, 158.6, 155.4, 144.2, 135.7, 135.6, 133.1, 132.9, 130.5, 130.0, 128.0, 120.8, 118.9, 104.0, 98.7, 79.8, 65.6, 55.5, 55.4, 53.7, 52.6, 52.3, 52.1, 39.1, 37.0, 32.4, 28.5, 27.0, 19.4;  $\nu_{\text{max}}$  (neat): 3302, 2934, 2859, 1744, 1711, 1661, 1616, 1509, 1463, 1264, 1208, 1163, 1113, 1039, 824, 741, 705, 613, 506  $\text{cm}^{-1}$ ; HRMS (ESI)  $m/z$  calcd for  $\text{C}_{44}\text{H}_{61}\text{N}_4\text{O}_{10}\text{Si}^+$   $[\text{M} + \text{H}]^+$ : 833.4152, found: 833.4159.

### Preparation of 17.

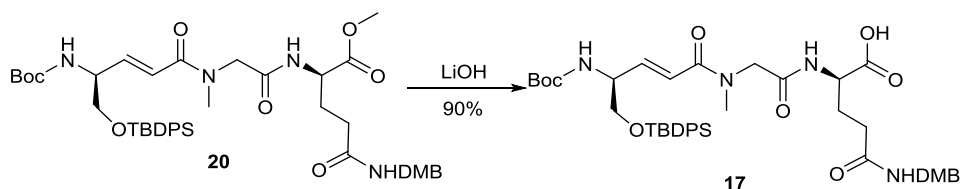

The titled compound **17** was obtained following the procedure described for **13**. The solvent was evaporated to obtain compound **17** (140 mg, 90%) as a yellow oil.  $[\alpha]_D^{20} = -1.1$  ( $c = 1.0$ ,  $\text{CHCl}_3$ );  $^1\text{H NMR}$  (400 MHz,  $\text{DMSO}-d_6$ , including rotamer = 2:1)  $\delta$  8.19 (s, 1H), 7.61 (dt,  $J = 7.6, 4.1$  Hz, 4H), 7.43 (tq,  $J = 10.5, 5.6$  Hz, 6H), 7.15 (d,  $J = 8.8$  Hz, 1H), 7.04 (d,  $J = 8.3$  Hz, 1H), 6.66 (dt,  $J = 11.1, 5.4$  Hz, 1H), 6.59 – 6.37 (m, 3H), 4.38 (dd,  $J = 15.9, 8.6$  Hz, 1H), 4.13 (d,  $J = 5.6$  Hz, 2H), 4.02 (dd,  $J = 14.0, 7.0$  Hz, 2H), 3.75 (s, 3H), 3.71 (s, 3H), 3.60 (dd,  $J = 11.5, 6.4$  Hz, 2H), 3.03 (s, 2H), 2.84 (s, 1H), 2.15 (s, 2H), 1.97 (s, 1H), 1.81 (s, 1H), 1.37 (d,  $J = 9.6$  Hz, 9H), 0.98 (d,  $J = 3.6$  Hz, 9H);  $^{13}\text{C NMR}$  (100 MHz,  $\text{DMSO}-d_6$ , including rotamer)  $\delta$  172.4, 167.1, 166.9, 166.1, 165.5, 159.5, 157.5, 155.2, 142.5, 141.7, 135.1, 132.9, 129.8, 128.5, 127.8, 121.2, 119.3, 104.2, 98.1, 77.9, 65.7, 65.5, 55.3, 55.1, 53.5, 52.2, 50.5, 36.7, 36.2, 32.4, 29.2, 28.2, 26.6, 18.8;  $\nu_{\text{max}}$  (KBr): 3300, 2934, 1664, 1529, 1463, 1420, 1367, 1289, 1260, 1209, 1162, 1115, 1041, 971, 825, 742, 704, 612, 506  $\text{cm}^{-1}$ ; HRMS (ESI)  $m/z$  calcd for  $\text{C}_{43}\text{H}_{58}\text{N}_4\text{O}_{10}\text{NaSi}^+$   $[\text{M} + \text{Na}]^+$ : 841.3815, found: 841.3810.

### Unsuccessful synthesis of 16.

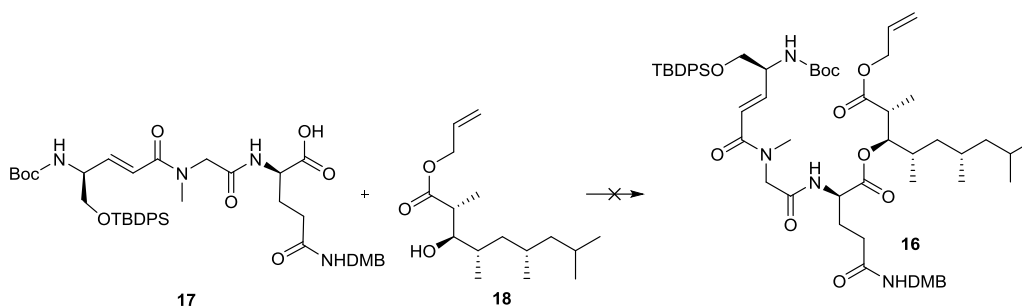

| entry | reaction conditions | Solvent | yield/%         |
|-------|---------------------|---------|-----------------|
| 1     | DIC, DMAP           | DCM     | nd <sup>a</sup> |
| 2     | MYTsA, TEA          | ACN     | nd <sup>a</sup> |

<sup>a</sup> nd = not detected (by TLC analysis).\_MYTsA = N-methyl ynetoluenesulfonamide; PTSA H<sub>2</sub>O = *p*-toluenesulfonic acid monohydrate.

Entry 1:

To a solution of compound **17** (100 mg, 0.12 mmol) and **18** (32 mg, 0.12 mmol) in DCM (240  $\mu$ L) were added DMAP (1.2 mg, 0.01 mmol) and DIC (20  $\mu$ L, 0.13 mmol) at 0  $^{\circ}$ C. The reaction mixture was stirred for 3 h, and diluted with DCM (20 mL). The suspension was filtered through a pad of celite and the filter cake was washed with DCM (3  $\times$  10 mL). The combined filtrates were concentrated under reduced pressure. The crude was purified by column chromatography on silica gel (petroleum ether/ ethyl acetate = 3:1) to obtain a new product. However, considerable racemization at the  $\alpha$ -position of acid fragment **17** was observed.

Entry 2:

The solution of compound **17** (100 mg, 0.12 mmol) and MYTsA (27.6 mg, 0.13 mmol) in DCM (1.2 mL) was stirred at r.t. overnight. TLC analysis showed compound **17** was consumed out. The reaction mixture was concentrated under reduced pressure followed by addition of ACN (1.2 mL) and TEA (12 mg, 0.12 mmol). The reaction mixture was stirred for another 12 h at r.t.. No new compound was detected through TLC analysis.

### Preparation of **18**.

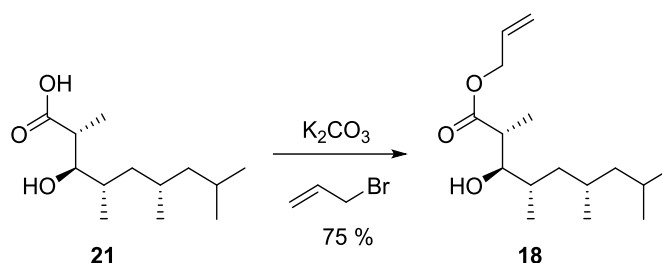

To a solution of known acid **21** (100 mg, 0.43 mmol) in DMF (4 mL) were added K<sub>2</sub>CO<sub>3</sub> (119 mg, 0.86 mmol) and 3-bromoprop-1-ene (77 mg, 0.65 mmol) at r.t.. The mixture was stirred for 10 h followed by addition of H<sub>2</sub>O (10mL). The resultant mixture was extracted with ethyl acetate (3  $\times$  50 mL). The combined organic phases were washed by brine (4  $\times$  50 mL), dried

over MgSO<sub>4</sub>, filtered and concentrated under reduced pressure. The crude was purified with column chromatography on silica gel (petroleum ether/ ethyl acetate = 30:1) to afford compound **18** (87 mg, 75 %) as a colorless oil.  $[\alpha]_D^{15} = -20.4$  ( $c = 1.0$ , CHCl<sub>3</sub>); <sup>1</sup>H NMR (400 MHz, CDCl<sub>3</sub>) δ 5.92 (ddtd,  $J = 16.4, 10.9, 5.7, 2.3$  Hz, 1H), 5.38 – 5.28 (m, 1H), 5.27 – 5.20 (m, 1H), 4.61 (dd,  $J = 5.5, 2.2$  Hz, 2H), 3.59 (ddt,  $J = 8.6, 5.8, 2.7$  Hz, 1H), 2.66 (pd,  $J = 7.3, 2.2$  Hz, 1H), 2.42 (dd,  $J = 6.2, 2.4$  Hz, 1H), 1.77 – 1.59 (m, 2H), 1.62 – 1.50 (m, 1H), 1.38 (dtd,  $J = 13.8, 6.9, 2.3$  Hz, 1H), 1.17 (dd,  $J = 7.2, 2.3$  Hz, 3H), 1.14 – 0.97 (m, 2H), 1.01 – 0.88 (m, 1H), 0.89 – 0.77 (m, 12H); <sup>13</sup>C NMR (100 MHz, CDCl<sub>3</sub>) δ 176.4, 132.1, 118.6, 75.5, 65.4, 46.7, 43.4, 42.0, 32.0, 27.5, 25.3, 23.8, 22.2, 20.4, 14.5, 13.3;  $\nu_{\max}$  (neat): 3530, 2957, 1724, 1461, 1382, 1259, 1173, 1035, 985, 930, 751 cm<sup>-1</sup>; HRMS (ESI)  $m/z$  calcd for C<sub>16</sub>H<sub>30</sub>O<sub>3</sub>Na<sup>+</sup> [M + Na]<sup>+</sup>: 293.2088, found: 293.2091.

### Preparation of **29**.

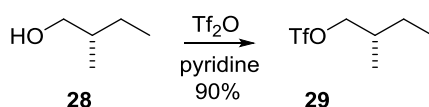

To a suspension of pyridine (28.6 mL, 354.45 mmol) and Tf<sub>2</sub>O (100 g, 354.45 mmol) in 300 mL of DCM was added compound **28** (40.5 mL, 372.17 mmol) under Ar atmosphere at 0 °C. The reaction mixture was stirred for 2 h and concentrated under reduced pressure. The residue was purified by column chromatography on silica gel (petroleum ether) to obtain compound **29** (8.6 g, 90 %) as a colorless oil. <sup>1</sup>H NMR (400 MHz, CDCl<sub>3</sub>) δ 4.40 (dd,  $J = 9.5, 5.7$  Hz, 1H), 4.34 (dd,  $J = 9.5, 6.4$  Hz, 1H), 1.93 – 1.83 (m, 1H), 1.55 – 1.43 (m, 1H), 1.27 (dt,  $J = 13.5, 7.5$  Hz, 1H), 1.01 (d,  $J = 6.8$  Hz, 3H), 0.95 (t,  $J = 7.5$  Hz, 3H); <sup>13</sup>C NMR (100 MHz, CDCl<sub>3</sub>) δ 118.8 (d,  $J = 319.5$  Hz), 81.8, 34.9, 25.3, 15.8, 11.1; <sup>19</sup>F NMR (375 MHz, CDCl<sub>3</sub>) δ -74.75. The spectroscopic data were identical with those reported in the literature (*J. Org. Chem.* **2002**, 67, 5176–5183).

### Preparation of **31**.

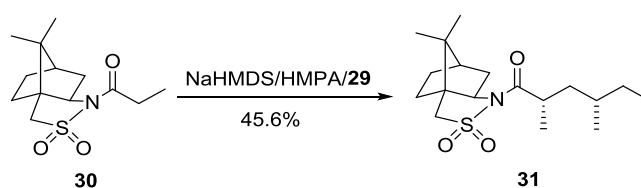

To a solution of compound **30** (96.2 g, 354.45 mmol) and HMPA (69.9 mL, 389.90 mmol) in THF (500 mL) was added NaHMDS (177.2 mL, 354.45 mmol, 2 M in THF) under Ar atmosphere at -78 °C. The reaction mixture was stirred for 0.5 h followed by addition of compound **29** (8.6 g) over 30 min. The reaction mixture was stirred for another 8 h at -78 °C, quenched with NH<sub>4</sub>Cl (100 mL) and separated. The aqueous phase was extracted with ethyl acetate (2 × 300 mL). The combined organic phases were washed with 5% NaHSO<sub>4</sub> (400 mL) and brine (200 mL), dried over Na<sub>2</sub>SO<sub>4</sub>, filtered and concentrated under reduced pressure. The crude was purified by column chromatography on silica gel (petroleum ether/ ethyl acetate = 35:1) to obtain compound **31** (49.6 g, 45.6 %) as a white solid. Melting point: 68 – 71 °C;  $[\alpha]_D^{15} = -74.0$  ( $c = 1.0$ , CHCl<sub>3</sub>); <sup>1</sup>H NMR (400 MHz, CDCl<sub>3</sub>) δ 3.79 (dd,  $J = 7.4, 5.1$  Hz, 1H), 3.43 (d,  $J = 13.8$  Hz, 1H), 3.35 (d,  $J = 13.8$  Hz, 1H), 3.10 (ddq,  $J = 11.8, 9.1, 6.4$  Hz, 1H), 2.01 –

1.88 (m, 2H), 1.88 – 1.71 (m, 3H), 1.69 (td,  $J = 9.0, 4.5$  Hz, 1H), 1.36 – 1.28 (m, 1H), 1.27 – 1.18 (m, 2H), 1.17 – 1.10 (m, 1H), 1.10 – 0.97 (m, 8H), 0.87 (s, 3H), 0.80 (d,  $J = 6.3$  Hz, 3H), 0.73 (t,  $J = 7.3$  Hz, 3H);  $^{13}\text{C}$  NMR (100 MHz,  $\text{CDCl}_3$ )  $\delta$  176.6, 65.1, 53.0, 48.1, 47.6, 44.6, 42.6, 38.5, 37.6, 32.7, 32.4, 29.5, 26.3, 20.6, 19.8, 18.9, 17.7, 11.1;  $\nu_{\text{max}}$  (neat): 2961, 1695, 1460, 1390, 1331, 1268, 1211, 1133, 1061, 1037, 769, 540  $\text{cm}^{-1}$ ; HRMS (ESI)  $m/z$  calcd for  $\text{C}_{18}\text{H}_{32}\text{NO}_3\text{S}^+ [\text{M} + \text{H}]^+$ : 342.2098, found: 342.2101.

### Preparation of **32**.

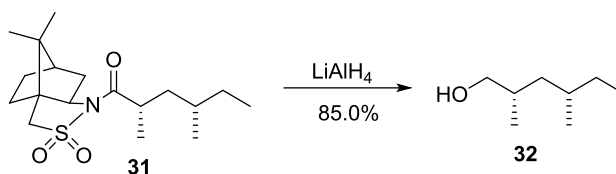

To a suspension of  $\text{LiAlH}_4$  (2.7 g, 71.3 mmol) in THF (100 mL) was added compound **31** (20.3 g, 59.4 mmol, in 150 mL of THF) at 0  $^\circ\text{C}$ . After stirred for 30 min, the reaction mixture was warmed to r.t.. The reaction mixture was stirred for another 3 h, quenched with  $\text{H}_2\text{O}$  (2.7 mL), 15%  $\text{NaOH}$  (aq., m/v, 8.1 mL), and  $\text{H}_2\text{O}$  (2.7 mL) successively. The resulting suspension was added with anhydrous  $\text{MgSO}_4$ , and stirred for 20 min. The solid was removed by filtration and the residue was washed with DCM (3  $\times$  400 mL). The combined organic phases were concentrated under reduced pressure. The crude was purified by column chromatography on silica gel (petroleum ether (30–60 boiling range)/ ethyl acetate = 20:1) to obtain compound **32** (6.5 g, 85.0%) as colorless liquid.  $[\alpha]_{\text{D}}^{15} = -4.0$  ( $c = 2.0$ ,  $\text{CHCl}_3$ );  $^1\text{H}$  NMR (400 MHz,  $\text{CDCl}_3$ )  $\delta$  3.49 (dd,  $J = 10.5, 5.2$  Hz, 1H), 3.33 (dd,  $J = 10.5, 6.8$  Hz, 1H), 1.90 – 1.81 (m, 1H), 1.75 – 1.61 (m, 1H), 1.45 – 1.33 (m, 2H), 1.32 – 1.24 (m, 2H), 1.04 (dq,  $J = 13.1, 7.4$  Hz, 1H), 0.89 (d,  $J = 6.7$  Hz, 3H), 0.88 – 0.79 (m, 6H);  $^{13}\text{C}$  NMR (100 MHz,  $\text{CDCl}_3$ )  $\delta$  68.4, 40.7, 33.2, 31.7, 29.1, 19.9, 17.4, 11.2;  $\nu_{\text{max}}$  (neat): 2959, 2925, 1721, 1461, 1379, 1264, 1167, 1034, 750  $\text{cm}^{-1}$ . The spectroscopic data and physical properties of **32** were identical with those reported in the literature (*Angew. Chem. Int. Ed.* **2017**, *56*, 7525-7530).

### Preparation of **33**.

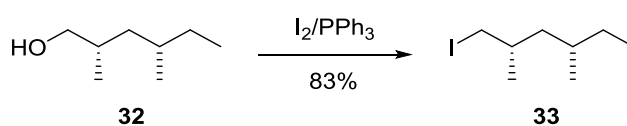

To a solution of  $\text{I}_2$  (12.9 g, 50.8 mmol), imidazole (3.5 g, 50.8 mmol) and  $\text{PPh}_3$  (13.3 g, 50.8 mmol, 1.1 eq) in DCM (250 mL) was added compound **32** (6.0 g in 100 mL of DCM, 50.8 mmol) under Ar atmosphere at 0  $^\circ\text{C}$ . The reaction mixture was stirred for 2 h and concentrated under reduced pressure. The residue was purified by column chromatography on silica gel (*n*-pentane) to obtain compound **33** (10.1 g, 83%) as a light-yellow liquid.  $[\alpha]_{\text{D}}^{15} = +5.1$  ( $c = 2.0$ ,  $\text{CHCl}_3$ );  $^1\text{H}$  NMR (400 MHz,  $\text{CDCl}_3$ )  $\delta$  3.25 (dd,  $J = 9.6, 4.1$  Hz, 1H), 3.13 (dd,  $J = 9.6, 6.0$  Hz, 1H), 1.50 (dtd,  $J = 13.0, 6.8, 4.3$  Hz, 1H), 1.42 – 1.27 (m, 3H), 1.23 – 1.03 (m, 1H), 1.05 – 0.97 (m, 1H), 0.96 (d,  $J = 6.5$  Hz, 3H), 0.88 (dd,  $J = 8.3, 6.8$  Hz, 6H);  $^{13}\text{C}$  NMR (100 MHz,  $\text{CDCl}_3$ )  $\delta$  43.7, 32.0, 31.7, 29.5, 21.5, 19.5, 18.5, 11.3;  $\nu_{\text{max}}$  (neat): 2960, 2923, 1698, 1460, 1378, 1316,

1194, 1137, 766, 605  $\text{cm}^{-1}$ ; Elem. Anal.: calcd for  $\text{C}_8\text{H}_{17}\text{I}$ : C, 40.02; H, 7.14; I, 52.85, found: C, 40.78; H, 6.96; I, 52.26.

### Preparation of 35.

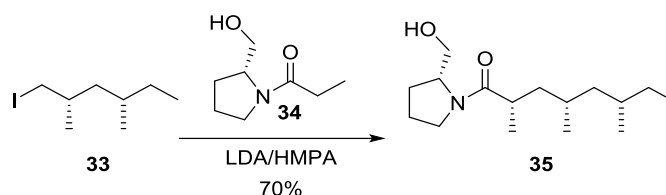

To the solution of diisopropylamine (1.35 mL, 9.58 mmol) in THF (8 mL) was added *n*-BuLi (2.5 M, 3.82 mL, 9.16 mmol) dropwise at  $-10\text{ }^\circ\text{C}$  under Ar atmosphere. The reaction mixture was warmed to r.t., stirred for 40 min, and then cooled back to  $-10\text{ }^\circ\text{C}$  followed by addition of compound **34** (983 mg, 6.25 mmol) dropwise. After stirred for 1 h, HMPA (1.72 g, 9.58 mmol) was added to the mixture. The reaction mixture was cooled to  $-78\text{ }^\circ\text{C}$  followed by addition of compound **33** (1.00 g, 4.16 mmol, in 5 mL of THF) dropwise. After stirred for 10 h at  $-78\text{ }^\circ\text{C}$ , the reaction was quenched with saturated aqueous  $\text{NH}_4\text{Cl}$  (30 mL), EtOAc (50 mL) and separated. The organic phase was washed with brine ( $3 \times 20\text{ mL}$ ), dried over  $\text{Na}_2\text{SO}_4$ , and filtered. The filtrate was concentrated and purified by column chromatography on silica gel (petroleum ether/ ethyl acetate = 5:1) to obtain compound **35** (785 mg, 70%) as a colorless oil.  $[\alpha]_D^{15} = +54.0$  ( $c = 2.0$ ,  $\text{CHCl}_3$ );  $^1\text{H NMR}$  (400 MHz,  $\text{CDCl}_3$ )  $\delta$  5.29 (s, 1H), 4.21 (dq,  $J = 11.2$ , 3.9, 3.1 Hz, 1H), 3.66–3.51 (m, 3H), 3.54–3.43 (m, 1H), 2.65 (h,  $J = 6.7$  Hz, 1H), 2.09–1.94 (m, 1H), 1.88 (ddq,  $J = 26.0$ , 13.2, 6.5 Hz, 2H), 1.72 (ddd,  $J = 13.7$ , 8.5, 5.4 Hz, 1H), 1.57 (dq,  $J = 11.7$ , 6.0 Hz, 1H), 1.52–1.36 (m, 2H), 1.31 (ddd,  $J = 12.7$ , 6.8, 5.0 Hz, 1H), 1.16 (dt,  $J = 13.8$ , 6.9 Hz, 1H), 1.11 (d,  $J = 6.8$  Hz, 3H), 1.03 (dq,  $J = 14.3$ , 7.2 Hz, 2H), 0.87 (dd,  $J = 15.1$ , 8.4 Hz, 1H), 0.85–0.78 (m, 9H);  $^{13}\text{C NMR}$  (100 MHz,  $\text{CDCl}_3$ )  $\delta$  178.5, 67.8, 61.1, 47.9, 44.8, 41.1, 35.7, 31.5, 29.1, 28.3, 28.1, 24.6, 20.9, 19.8, 18.5, 11.3;  $\nu_{\text{max}}$  (neat): 3392, 2960, 2927, 2875, 1619, 1462, 1434, 1377, 1335, 1188, 1055, 753  $\text{cm}^{-1}$ ; HRMS (ESI)  $m/z$  calcd for  $\text{C}_{16}\text{H}_{32}\text{NO}_2^+$   $[\text{M} + \text{H}]^+$ : 270.2428, found: 270.2431.

### Preparation of 36.

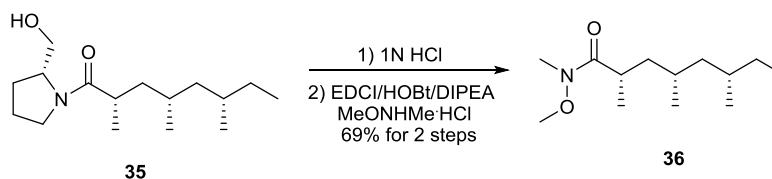

The solution of compound **35** (2.5 g, 9.28 mmol) in 1 N HCl (90 mL) was stirred at  $90\text{ }^\circ\text{C}$  for 6 h. The aqueous phase was extracted with ethyl acetate ( $3 \times 80\text{ mL}$ ). The combined organic phases were washed with brine (100 mL), dried over  $\text{Na}_2\text{SO}_4$ , filtered and concentrated under reduced pressure. The above-obtained acid crude was dissolved in anhydrous DCM (46 mL) followed by addition of HOBt (1.25 g, 9.28 mmol), EDCI (1.77 g, 9.28 mmol), DIPEA (1.80 g, 13.92 mmol) and *N,O*-dimethylhydroxylamine hydrochloride (1.36 g, 13.92 mmol). The reaction mixture was stirred for another 12 h, quenched with  $\text{NH}_4\text{Cl}$  (100 mL), and separated. The aqueous phase was extracted with ethyl acetate ( $2 \times 100\text{ mL}$ ). The combined organic phases were washed with 5%  $\text{NaHSO}_4$  (100 mL),  $\text{NaHCO}_3$  (100 mL) and brine (100 mL), dried over

Na<sub>2</sub>SO<sub>4</sub>, filtered and concentrated under reduced pressure. The crude was purified by column chromatography on silica gel (petroleum ether/ ethyl acetate = 20:1) to obtain compound **36** (1.47 g, 69% for 2 steps) as a yellow oil.  $[\alpha]_D^{15} = +16.9$  ( $c = 2.0$ , CHCl<sub>3</sub>); <sup>1</sup>H NMR (400 MHz, CDCl<sub>3</sub>) δ 3.67 (s, 3H), 3.15 (s, 3H), 3.03 – 2.93 (m, 1H), 1.75 (ddd,  $J = 13.8, 9.2, 4.9$  Hz, 1H), 1.50 – 1.35 (m, 2H), 1.38 – 1.20 (m, 1H), 1.17 (dt,  $J = 14.2, 7.0$  Hz, 1H), 1.07 (d,  $J = 6.8$  Hz, 3H), 1.00 (tdd,  $J = 13.7, 8.8, 4.1$  Hz, 2H), 0.92 – 0.86 (m, 1H), 0.88 – 0.77 (m, 9H); <sup>13</sup>C NMR (100 MHz, CDCl<sub>3</sub>) δ 180.3, 61.5, 45.0, 41.4, 32.8, 32.5, 31.6, 29.3, 28.3, 20.7, 19.8, 18.5, 11.3;  $\nu_{\max}$  (neat): 2961, 2929, 1735, 1669, 1462, 1413, 1381, 1305, 1176, 998, 753, 601 cm<sup>-1</sup>; HRMS (ESI)  $m/z$  calcd for C<sub>13</sub>H<sub>28</sub>NO<sub>2</sub><sup>+</sup> [M + H]<sup>+</sup>: 230.2115, found: 230.2116.

### Preparation of **26**.

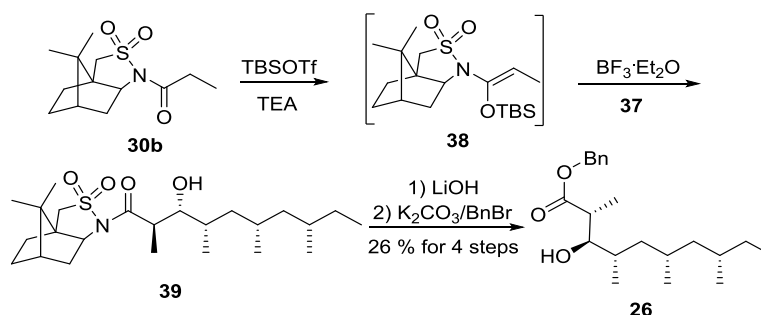

To a solution of compound **38** (18.3 mmol) in DCM (30 mL) was added aldehyde **37** (6.10 mmol in 20 mL of DCM) at  $-78$  °C under Ar atmosphere. After stirred for 30 min, the reaction mixture was added with BF<sub>3</sub>·Et<sub>2</sub>O (866 mg, 6.10 mmol). The reaction mixture was stirred at  $-78$  °C for 3 h before saturated aqueous Na<sub>2</sub>CO<sub>3</sub> (30 mL) was added. The resulting mixture was separated and the aqueous phase was extracted with ethyl acetate (2 × 50 mL). The combined organic phases were washed with brine (30 mL), dried over Na<sub>2</sub>SO<sub>4</sub>, filtered and concentrated under reduced pressure. The crude product was purified by column chromatography on silica gel (petroleum ether/ ethyl acetate = 15:1) to obtain crude **39**. The above-obtained compound **39** was dissolved in THF/ MeOH/ H<sub>2</sub>O ( $v/v/v = 36 \text{ mL}/ 12 \text{ mL}/ 12 \text{ mL}$ ) followed by addition of LiOH (438 mg, 18.30 mmol). After stirred for 4 h, the reaction mixture was acidified to pH = 3.0 with aqueous 10% NaHSO<sub>4</sub>, extracted with ethyl acetate (2 × 100 mL) and separated. The organic phase was evaporated, and the resulting colorless oil was directly used for the next step without further purification. The above-obtained colorless oil was dissolved in DMF (30 mL) followed by addition of K<sub>2</sub>CO<sub>3</sub> (2.53 g, 18.30 mmol) and BnBr (2.07 g, 12.2 mmol) at r.t.. The mixture was stirred for 10 h, added with H<sub>2</sub>O (10 mL). The resultant mixture was extracted with ethyl acetate (3 × 50 mL). The combined organic phases were washed by brine (4 × 50 mL), dried over MgSO<sub>4</sub>, filtered and concentrated under reduced pressure. The crude was purified with column chromatography on silica gel (petroleum ether/ ethyl acetate = 35:1) to afford compound **26** (489 mg, 26 % for 4 steps) as a colorless oil.  $[\alpha]_D^{15} = -32.1$  ( $c = 2.0$ , CHCl<sub>3</sub>); <sup>1</sup>H NMR (400 MHz, CDCl<sub>3</sub>) δ 7.36 (d,  $J = 3.4$  Hz, 5H), 5.19 (d,  $J = 12.4$  Hz, 1H), 5.14 (d,  $J = 12.4$  Hz, 1H), 3.65 (ddd,  $J = 8.8, 5.9, 3.1$  Hz, 1H), 2.69 (p,  $J = 7.4$  Hz, 1H), 2.38 (d,  $J = 5.9$  Hz, 1H), 1.72 (hd,  $J = 6.8, 3.0$  Hz, 1H), 1.59 (dd,  $J = 13.8, 7.1$  Hz, 1H), 1.50 – 1.40 (m, 2H), 1.40 – 1.30 (m, 1H), 1.24 – 1.19 (m, 1H), 1.17 (d,  $J = 7.1$  Hz, 3H), 1.11 – 0.89 (m, 3H), 0.89 – 0.80 (m, 12H); <sup>13</sup>C NMR (100 MHz, CDCl<sub>3</sub>) δ 176.5, 136.0, 128.7, 128.4, 128.3, 75.2, 66.5, 44.9, 43.6, 41.6, 31.9, 31.7, 29.1, 27.4, 20.8, 20.0, 14.5, 13.5, 11.3;  $\nu_{\max}$  (neat): 2958, 2926,

1736, 1620, 1459, 1380, 1261, 1170, 1131, 984, 749, 698  $\text{cm}^{-1}$ ; HRMS (ESI)  $m/z$  calcd for  $\text{C}_{21}\text{H}_{34}\text{O}_3\text{Na}^+ [\text{M} + \text{Na}]^+$ : 357.2401, found: 357.2395.

### Preparation of **40**.

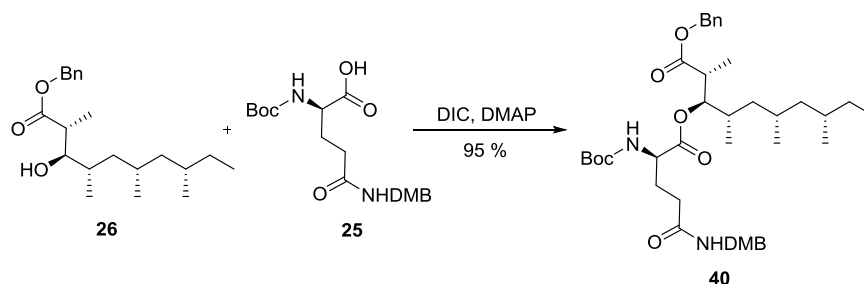

To a solution of compound **25** (1.31 g, 3.59 mmol) and **26** (400 mg, 1.19 mmol) in DCM (1.20 mL) were added DMAP (14.7 mg, 0.12 mmol) and DIC (612  $\mu\text{L}$ , 3.95 mmol) at 0  $^\circ\text{C}$ . The reaction mixture was stirred for 1.5 h, diluted with DCM (50 mL). The suspension was filtered through a pad of celite and the filter cake was washed with DCM ( $3 \times 10$  mL). The combined filtrates were concentrated under reduced pressure. The crude was purified by column chromatography on silica gel (petroleum ether/ ethyl acetate = 20 to 10:1) to obtain compound **40** (768 mg, 95 %) as a colorless oil.  $[\alpha]_D^{15} = -9.4$  ( $c = 2.0$ ,  $\text{CHCl}_3$ );  $^1\text{H}$  NMR (400 MHz,  $\text{CDCl}_3$ )  $\delta$  7.36 – 7.27 (m, 5H), 7.16 (d,  $J = 8.2$  Hz, 1H), 6.50 – 6.31 (m, 3H), 5.21 (d,  $J = 8.2$  Hz, 1H), 5.14 (dd,  $J = 8.9, 3.1$  Hz, 1H), 4.99 (q,  $J = 12.3$  Hz, 2H), 4.35 (d,  $J = 5.6$  Hz, 2H), 4.22 (td,  $J = 8.0, 4.5$  Hz, 1H), 3.79 (s, 3H), 3.75 (s, 3H), 2.81 (p,  $J = 7.5$  Hz, 1H), 2.26 – 2.05 (m, 3H), 1.93 – 1.75 (m, 2H), 1.61 (dq,  $J = 13.7, 6.5$  Hz, 1H), 1.42 (s, 9H), 1.35 (ddt,  $J = 11.6, 6.8, 3.8$  Hz, 2H), 1.28 – 1.19 (m, 3H), 1.14 (d,  $J = 7.2$  Hz, 3H), 1.00 (dp,  $J = 13.9, 7.4, 6.9$  Hz, 2H), 0.95 – 0.71 (m, 12H);  $^{13}\text{C}$  NMR (100 MHz,  $\text{CDCl}_3$ )  $\delta$  174.0, 171.7, 171.6, 160.6, 158.7, 155.6, 135.8, 130.6, 128.6, 128.5, 128.4, 119.1, 104.0, 98.7, 79.9, 77.9, 66.7, 55.5, 55.4, 53.1, 44.6, 42.3, 41.5, 39.0, 32.6, 31.5, 31.1, 28.8, 28.7, 28.4, 27.1, 20.6, 20.1, 14.3, 13.9, 11.2;  $\nu_{\text{max}}$  (neat): 2960, 2927, 2361, 1747, 1714, 1655, 1509, 1458, 1369, 1239, 1162, 1079, 1042, 750  $\text{cm}^{-1}$ ; HRMS (ESI)  $m/z$  calcd for  $\text{C}_{40}\text{H}_{61}\text{N}_2\text{O}_9^+ [\text{M} + \text{H}]^+$ : 713.4372, found: 713.4381.

### Preparation of **24**.

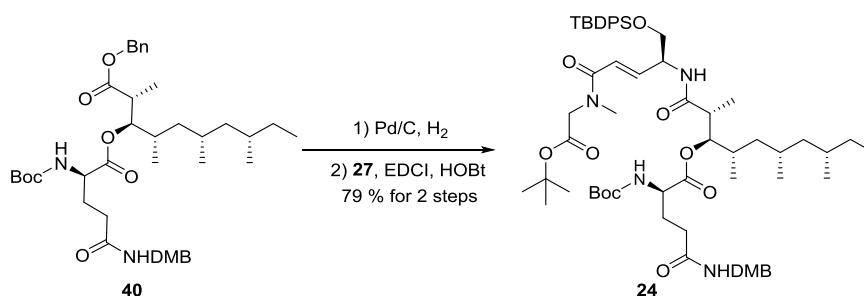

To a solution of compound **40** (721 mg, 1.06 mmol) in MeOH (20 mL) was added Pd/C (10%, 72 mg) under Ar atmosphere. The suspension was degassed under vacuum and purged with  $\text{H}_2$  for three times. The mixture was stirred under  $\text{H}_2$  balloon at 20  $^\circ\text{C}$  for 2 h. The resulting mixture was filtered through a short pad of silica gel, washed with MeOH ( $2 \times 30$  mL). The filtrates were concentrated under reduced pressure. The crude product was used directly for the next step. To a solution of the acid obtained above (0.53 mmol) and **27** (398 mg, 0.80 mmol) in



DCM (5 mL) were added EDCI (123 mg, 0.64 mmol) and HOBt (79 mg, 0.59 mmol) at r.t.. The reaction mixture was stirred for 12 h, quenched with 1% HCl (10 mL) and separated. The aqueous phase was extracted with ethyl acetate (2 × 10 mL). The combined organic phases were dried (Na<sub>2</sub>SO<sub>4</sub>) and concentrated under reduced pressure. The crude product was purified by column chromatography on silica gel (petroleum ether/ ethyl acetate = 8:1 to 2:1) to obtain **24** (450 mg, 79 % for 2 steps) as a colorless oil.  $[\alpha]_D^{15} = +12.0$  ( $c = 1.00$ , CHCl<sub>3</sub>); <sup>1</sup>H NMR (400 MHz, CDCl<sub>3</sub>, including rotamer, 3:1) δ 7.67 – 7.59 (m, 4H), 7.45 – 7.32 (m, 6H), 7.14 (d,  $J = 8.3$  Hz, 1H), 6.78 (dd,  $J = 15.1, 7.7$  Hz, 1H), 6.74 – 6.63 (m, 2H), 6.48 (d,  $J = 15.2$  Hz, 0.75H), 6.44 – 6.33 (m, 2H), 6.25 (d,  $J = 15.1$  Hz, 0.25H), 5.50 (d,  $J = 8.1$  Hz, 0.75H), 5.44 (d,  $J = 8.2$  Hz, 0.25H), 5.09 – 5.01 (m, 1H), 4.65 (td,  $J = 7.9, 4.1$  Hz, 1H), 4.39 (dd,  $J = 14.5, 6.4$  Hz, 1H), 4.25 (dd,  $J = 14.5, 5.5$  Hz, 1H), 4.18 – 4.02 (m, 2H), 3.94 (d,  $J = 17.1$  Hz, 0.75H), 3.85 (d,  $J = 18.2$  Hz, 0.25H), 3.77 (s, 3H), 3.74 (s, 3H), 3.71 (t,  $J = 6.8$  Hz, 2H), 3.06 (s, 2.25H), 2.93 (s, 0.75H), 2.35 (dt,  $J = 9.5, 6.8$  Hz, 1H), 2.30 – 2.13 (m, 2H), 2.15 – 2.01 (m, 1H), 1.86 (hept,  $J = 7.8, 7.0$  Hz, 2H), 1.57 (p,  $J = 8.1, 7.4$  Hz, 1H), 1.42 (s, 9H), 1.40 (s, 9H), 1.37 – 1.22 (m, 4H), 1.15 – 1.07 (m, 2H), 1.07 (d,  $J = 6.9$  Hz, 3H), 1.04 (s, 9H), 1.03 – 0.92 (m, 1H), 0.85 (d,  $J = 6.6$  Hz, 3H), 0.84 – 0.74 (m, 9H); <sup>13</sup>C NMR (100 MHz, CDCl<sub>3</sub>, including rotamer) δ 173.4, 173.3, 172.4, 170.8, 170.6, 168.4, 168.1, 166.8, 166.7, 160.4, 160.4, 158.6, 158.5, 156.1, 142.6, 142.3, 135.7, 133.2, 133.1, 130.2, 130.1, 129.9, 127.9, 122.6, 122.5, 119.2, 119.1, 103.9, 98.5, 82.5, 81.8, 79.6, 79.5, 65.4, 65.3, 55.4, 55.4, 53.8, 52.5, 52.2, 50.4, 45.1, 43.8, 41.4, 38.8, 38.7, 36.6, 35.0, 33.4, 31.5, 30.6, 28.8, 28.4, 28.1, 28.1, 27.7, 26.9, 26.8, 20.8, 20.0, 19.4, 14.1, 14.0, 13.6, 11.2;  $\nu_{\max}$  (neat): 3307, 2961, 2932, 1741, 1659, 1616, 1590, 1509, 1460, 1368, 1256, 1228, 1209, 1160, 1112, 1039, 975, 827, 745, 704, 506 cm<sup>-1</sup>; HRMS (ESI)  $m/z$  calcd for C<sub>61</sub>H<sub>93</sub>N<sub>4</sub>O<sub>12</sub>Si<sup>+</sup> [M + H]<sup>+</sup>: 1101.6554, found: 1101.6552.

### Preparation of **23**.

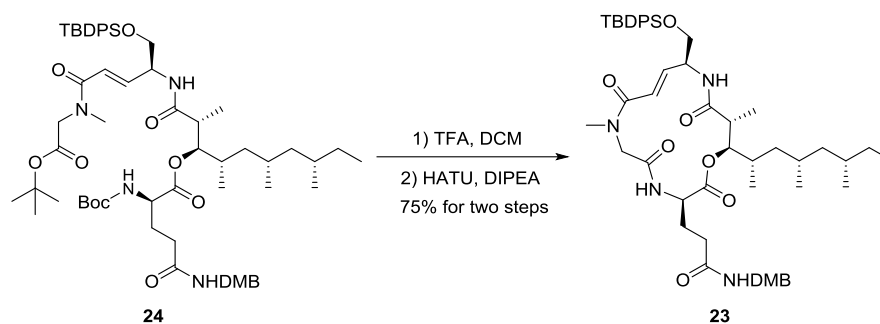

To a solution of **24** (900 mg, 0.84 mmol) in DCM (7 mL) was added trifluoroacetic acid (1.7 mL) at 0 °C. After stirred for 4 h, the reaction mixture was diluted with toluene (7 mL) and concentrated under reduced pressure. The resulting white solid was dissolved in THF (20 mL), and the solution was added to a suspension of HATU (4.81 g, 12.66 mmol) and DIPEA (4 mL, 25.32 mmol) in THF (850 mL) via a micro syringe pump (1 mL/h). The reaction was stirred for another 24 h at r.t.. After that, the reaction mixture was evaporated, diluted with MeOH and ethyl acetate ( $v/v = 2:1$ , 150 mL) and filtered through a short pad of silica gel. The filtrate was concentrated under reduced pressure. The residue was dissolved in ethyl acetate (300 mL), washed with 1 % HCl (50 mL), saturated NaHCO<sub>3</sub> (60 mL), and brine (60 mL). The organic phase was dried (Na<sub>2</sub>SO<sub>4</sub>) and concentrated under reduced pressure. The crude product was purified by column chromatography on silica gel (5% MeOH in DCM) to obtain **23** (570 mg,





white solid.  $[\alpha]_D^{15} = +83.7$  ( $c = 0.20$ , MeOH);  $^1\text{H}$  NMR (400 MHz, MeOD- $d_4$ )  $\delta$  7.11 (d,  $J = 14.9$  Hz, 1H), 6.24 (d,  $J = 15.0$  Hz, 1H), 5.53 (s, 1H), 5.47 (s, 1H), 5.37 (dd,  $J = 10.3, 1.7$  Hz, 1H), 4.60 (dd,  $J = 10.2, 4.5$  Hz, 1H), 4.54 (d,  $J = 15.3$  Hz, 1H), 4.00 (d,  $J = 17.8$  Hz, 1H), 3.14 (s, 3H), 3.04 – 2.94 (m, 1H), 2.30 (t,  $J = 7.6$  Hz, 2H), 2.24 – 2.06 (m, 1H), 2.06 – 1.98 (m, 1H), 1.98 – 1.89 (m, 1H), 1.82 – 1.74 (m, 1H), 1.49 – 1.31 (m, 2H), 1.30 – 1.23 (m, 1H), 1.22 (d,  $J = 7.0$  Hz, 3H), 1.21 – 1.13 (m, 1H), 1.13 – 1.05 (m, 1H), 1.05 (d,  $J = 6.8$  Hz, 3H), 0.98 – 0.91 (m, 2H), 0.91 – 0.83 (m, 9H);  $^{13}\text{C}$  NMR (100 MHz, MeOD- $d_4$ )  $\delta$  177.2, 175.7, 171.0, 170.2, 168.8, 141.2, 139.4, 120.3, 119.0, 78.2, 54.0, 53.8, 48.3, 44.2, 43.4, 37.6, 32.9, 32.1, 30.8, 28.3, 26.4, 24.3, 22.4, 20.1, 15.8, 14.1;  $\nu_{\text{max}}$  (neat): 3364, 2961, 2925, 2875, 2854, 2508, 2363, 2239, 2073, 1723, 1646, 1613, 1433, 1262, 1104, 1016, 980, 801, 752  $\text{cm}^{-1}$ ; HRMS (ESI)  $m/z$  calcd for  $\text{C}_{27}\text{H}_{45}\text{N}_4\text{O}_6^+$   $[\text{M} + \text{H}]^+$ : 521.3334, found: 521.3332.

## 4. Data Comparison of Synthesized and Natural Rakicidin F

Table S2. <sup>1</sup>H NMR Data Comparison (MeOH-*d*<sub>4</sub>)

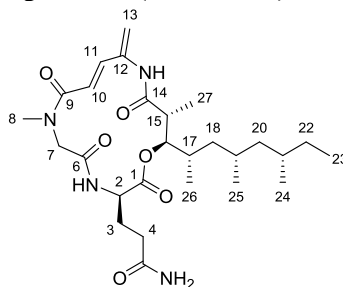

| position            | Natural Rakicidin F <sup>a</sup>                        | Synthetic Rakicidin F <sup>b</sup>                      | $\Delta\delta$ /ppm <sup>b</sup> | Synthetic Rakicidin F <sup>c</sup>                      | $\Delta\delta$ /ppm <sup>c</sup> |
|---------------------|---------------------------------------------------------|---------------------------------------------------------|----------------------------------|---------------------------------------------------------|----------------------------------|
|                     | $\delta_{\text{H}}$ mult ( <i>J</i> in Hz)<br>(600 MHz) | $\delta_{\text{H}}$ mult ( <i>J</i> in Hz)<br>(400 MHz) |                                  | $\delta_{\text{H}}$ mult ( <i>J</i> in Hz)<br>(400 MHz) |                                  |
| 2, CH               | 4.59, dd (10.2, 4.2)                                    | 4.59, dd (10.4, 4.6)                                    | 0.00                             | 4.60, dd (10.2, 4.5)                                    | -0.01                            |
| 3, CH <sub>2</sub>  | 2.12, m; 1.96, m                                        | 2.12, m; 1.95, m                                        | 0.00;<br>0.01                    | 2.13, m; 1.95, m                                        | -0.01;<br>0.01                   |
| 4, CH <sub>2</sub>  | 2.29, t (7.8)                                           | 2.30, t (7.7)                                           | -0.01                            | 2.30, t (7.6)                                           | -0.01                            |
| 7, CH <sub>2</sub>  | 4.47, d (17.4);<br>3.99, d (18.0)                       | 4.50, d (17.8);<br>3.99, d (17.9)                       | -0.03;<br>0.00                   | 4.54, d (15.3);<br>4.00, d (17.8)                       | <b>-0.07</b> ;<br>-0.01          |
| 8, CH <sub>3</sub>  | 3.13, s                                                 | 3.13, s                                                 | 0.00                             | 3.14, s                                                 | -0.01                            |
| 10, CH              | 6.20, d (15.0)                                          | 6.22, d (15.0)                                          | -0.02                            | 6.24, d (15.0)                                          | -0.04                            |
| 11, CH              | 7.12, d (14.4)                                          | 7.12, d (14.4)                                          | 0.00                             | 7.11, d (14.9)                                          | 0.01                             |
| 13, CH <sub>2</sub> | 5.54, s; 5.46, s                                        | 5.53, s; 5.47, s                                        | 0.01,<br>-0.01                   | 5.53, s; 5.47, s                                        | 0.01,<br>-0.01                   |
| 15, CH              | 2.92, m                                                 | 2.95, dq (10.1, 7.0)                                    | -0.03                            | 2.98, m                                                 | <b>-0.07</b>                     |
| 16, CH              | 5.38, dd (10.2, 1.2)                                    | 5.37, dd (10.4, 1.7)                                    | 0.01                             | 5.37, dd (10.3, 1.7)                                    | 0.01                             |
| 17, CH              | 2.02, m                                                 | 2.03, m                                                 | -0.01                            | 2.02, m                                                 | 0.00                             |
| 18, CH <sub>2</sub> | 1.28, m; 0.92, m                                        | 1.26, m; 0.93, m                                        | 0.02;<br>-0.01                   | 1.26, m; 0.93, m                                        | 0.02;<br>-0.01                   |
| 19, CH              | 1.79, m                                                 | 1.79, m                                                 | 0.00                             | 1.78, m                                                 | 0.01                             |
| 20, CH <sub>2</sub> | 1.18, m; 0.92, m                                        | 1.17, m; 0.94, m                                        | 0.01;<br>-0.02                   | 1.17, m; 0.93, m                                        | 0.01;<br>-0.01                   |
| 21, CH              | 1.42, m                                                 | 1.41, m                                                 | 0.01                             | 1.41, m                                                 | 0.01                             |
| 22, CH <sub>2</sub> | 1.42, m; 1.07, m                                        | 1.41, m; 1.08, m                                        | 0.01;<br>-0.01                   | 1.41, m; 1.08, m                                        | 0.01;<br>-0.01                   |
| 23, CH <sub>3</sub> | 0.88, m                                                 | 0.88, m                                                 | 0.00                             | 0.88, m                                                 | 0.00                             |
| 24, CH <sub>3</sub> | 0.88, m                                                 | 0.88, m                                                 | 0.00                             | 0.88, m                                                 | 0.00                             |
| 25, CH <sub>3</sub> | 0.88, m                                                 | 0.88, m                                                 | 0.00                             | 0.88, m                                                 | 0.00                             |
| 26, CH <sub>3</sub> | 1.04, d (6.6)                                           | 1.04, d (6.8)                                           | 0.00                             | 1.05, d (6.8)                                           | -0.01                            |
| 27, CH <sub>3</sub> | 1.22, d (7.2)                                           | 1.22, d (6.9)                                           | 0.00                             | 1.22, d (7.0)                                           | 0.00                             |

<sup>a</sup> *J. Antibiot.* **2018**, *71*, 139–141. <sup>b</sup> obtained via one-time column chromatography <sup>c</sup> obtained via two-time column chromatography followed by lyophilization

**Table S3. <sup>13</sup>C NMR Data Comparison (MeOH-*d*<sub>4</sub>)**

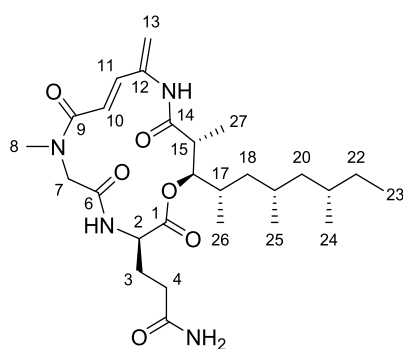

| position | Natural Rakicidin F <sup>a</sup> | Synthetic Rakicidin F <sup>b</sup> | $\Delta\delta$ /ppm |
|----------|----------------------------------|------------------------------------|---------------------|
|          | $\delta_C$ (125 MHz)             | $\delta_C$ (100 MHz)               |                     |
| 1        | 171.1                            | 171.0                              | 0.1                 |
| 2        | 53.9                             | 53.8                               | 0.1                 |
| 3        | 31.0                             | 30.9                               | 0.1                 |
| 4        | 33.1                             | 32.8                               | 0.3                 |
| 5        | 177.3                            | 177.2                              | 0.1                 |
| 6        | 170.3                            | 170.4                              | -0.1                |
| 7        | 54.1                             | 54.0                               | 0.1                 |
| 8        | 37.8                             | 37.6                               | 0.2                 |
| 9        | 168.9                            | 168.8                              | 0.1                 |
| 10       | 119.0                            | 119.0                              | 0.0                 |
| 11       | 141.4                            | 141.2                              | 0.2                 |
| 12       | 139.5                            | 139.3                              | 0.2                 |
| 13       | 120.5                            | 120.3                              | 0.2                 |
| 14       | 175.9                            | 175.8                              | 0.1                 |
| 15       | 44.3                             | 44.1                               | 0.2                 |
| 16       | 78.1                             | 78.1                               | 0.0                 |
| 17       | 32.2                             | 32.1                               | 0.1                 |
| 18       | 43.3                             | 43.2                               | 0.1                 |
| 19       | 28.3                             | 28.2                               | 0.1                 |
| 20       | 46.6                             | 46.5                               | 0.1                 |
| 21       | 32.9                             | 32.8                               | 0.1                 |
| 22       | 30.0                             | 29.8                               | 0.2                 |
| 23       | 11.7                             | 11.5                               | 0.2                 |
| 24       | 20.72                            | 20.59                              | 0.13                |
| 25       | 20.77                            | 20.62                              | 0.15                |
| 26       | 14.4                             | 14.2                               | 0.2                 |
| 27       | 16.0                             | 15.8                               | 0.2                 |

<sup>a</sup> *J. Antibiot.* **2018**, *71*, 139–141. <sup>b</sup> obtained via two-time column chromatography followed by lyophilization

**Table S4. IR, HRMS,  $[\alpha]_D$  Data Comparison**

|                                                                                                                                 | Natural rakicidin F <sup>a</sup> | Synthetic rakicidin F ( <b>1</b> ) |
|---------------------------------------------------------------------------------------------------------------------------------|----------------------------------|------------------------------------|
| Appearance                                                                                                                      | white powder                     | white powder                       |
| HRMS ( <i>m/z</i> ) Calcd for:<br>C <sub>27</sub> H <sub>45</sub> N <sub>4</sub> O <sub>6</sub> <sup>+</sup> [M+H] <sup>+</sup> |                                  | 521.3334                           |
| found                                                                                                                           | 521.3345(FAB)                    | 521.3332 (ESI)                     |
| $[\alpha]_D$ (MeOH)                                                                                                             | + 108 ( <i>c</i> = 0.21)         | + 83.7 ( <i>c</i> = 0.20)          |
| IR (neat) cm <sup>-1</sup>                                                                                                      | 3372, 2962, 1655, 1616           | 3368, 2961, 1646, 1613             |

<sup>a</sup> *J. Antibiot.* **2018**, *71*, 139–141.

## 5. Copies of NMR Spectrum

### <sup>1</sup>H NMR spectrum of compound 9a in CDCl<sub>3</sub> (400 MHz)

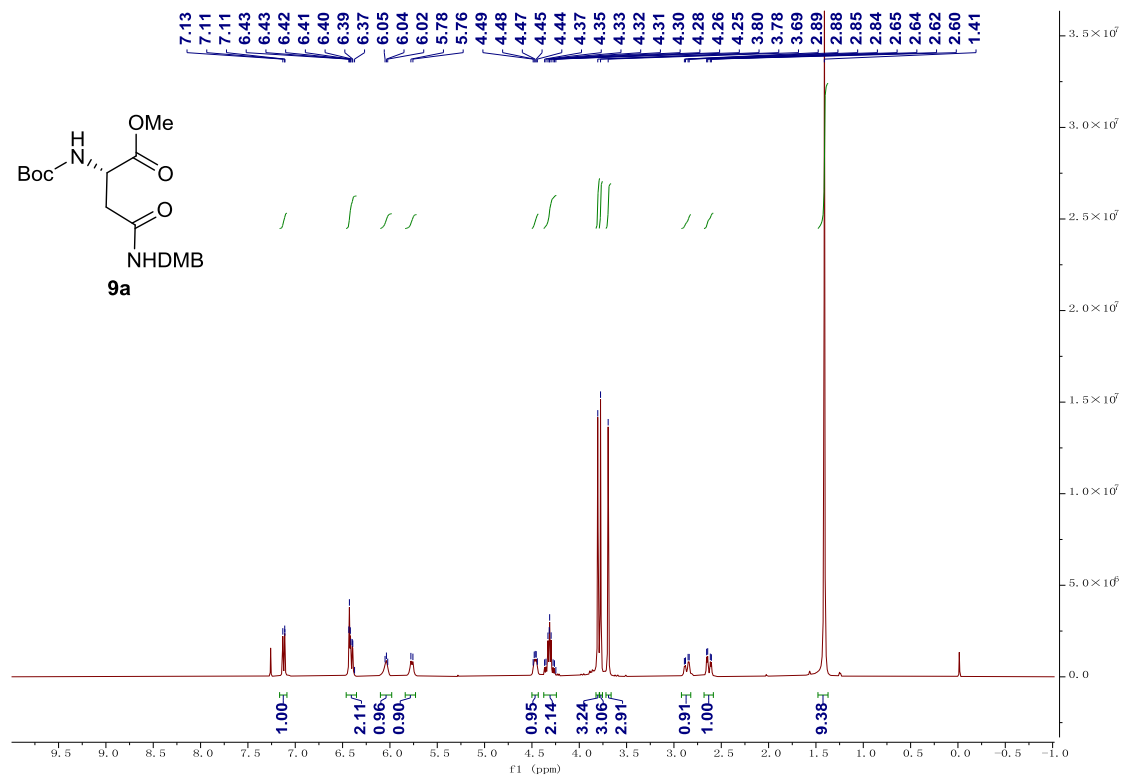

### <sup>13</sup>C NMR spectrum of compound 9a in CDCl<sub>3</sub> (100 MHz)

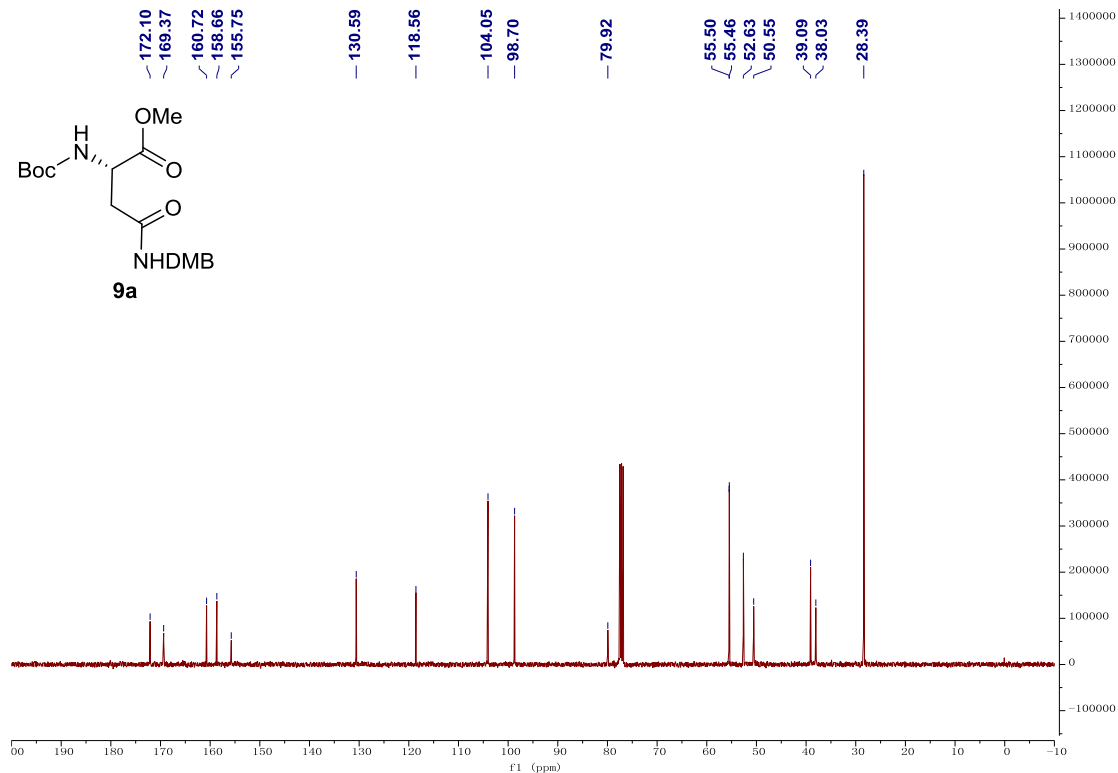



**<sup>1</sup>H NMR spectrum of compound 12 in CDCl<sub>3</sub> (400 MHz).**

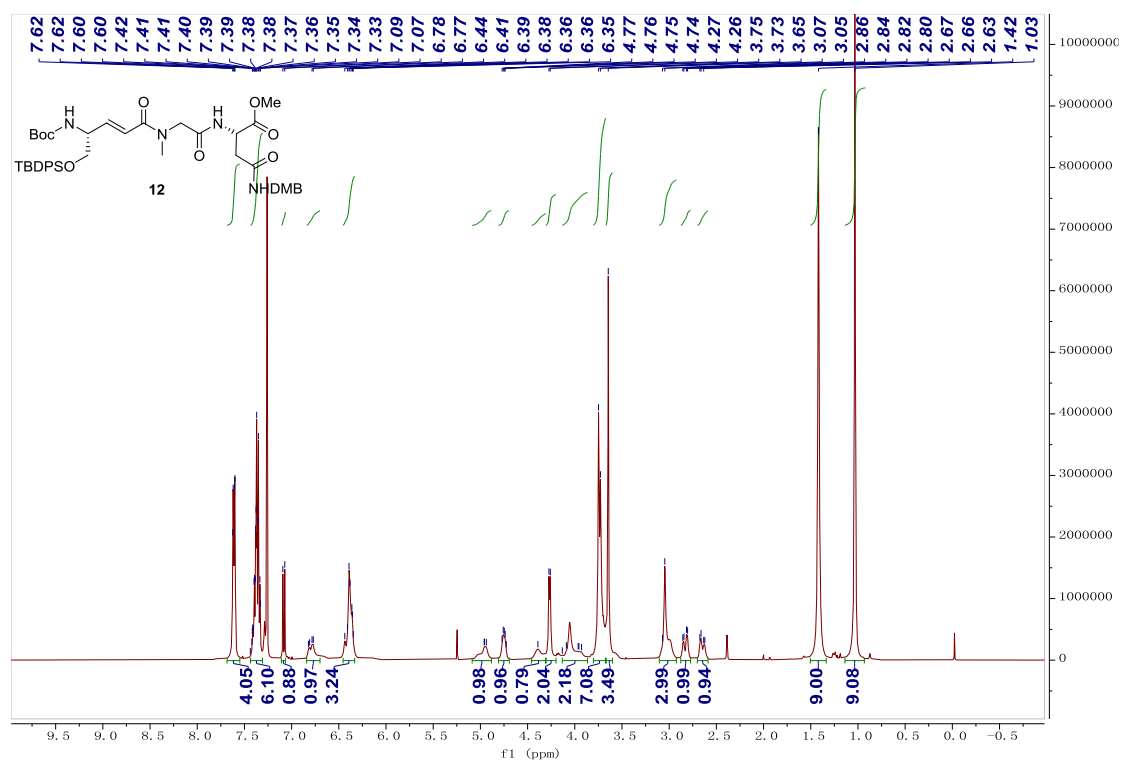

**<sup>13</sup>C NMR spectrum of compound 12 in CDCl<sub>3</sub> (100 MHz).**

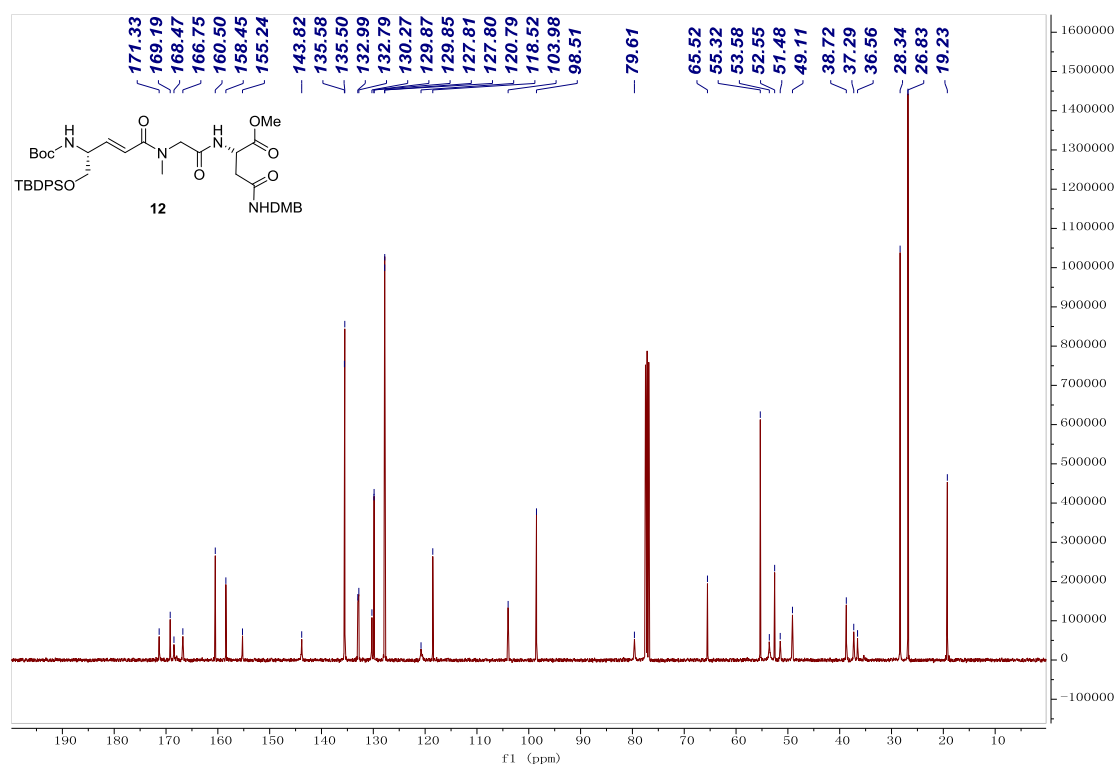

**$^1\text{H}$  NMR spectrum of compound 4 in  $\text{CDCl}_3$  (400 MHz).**

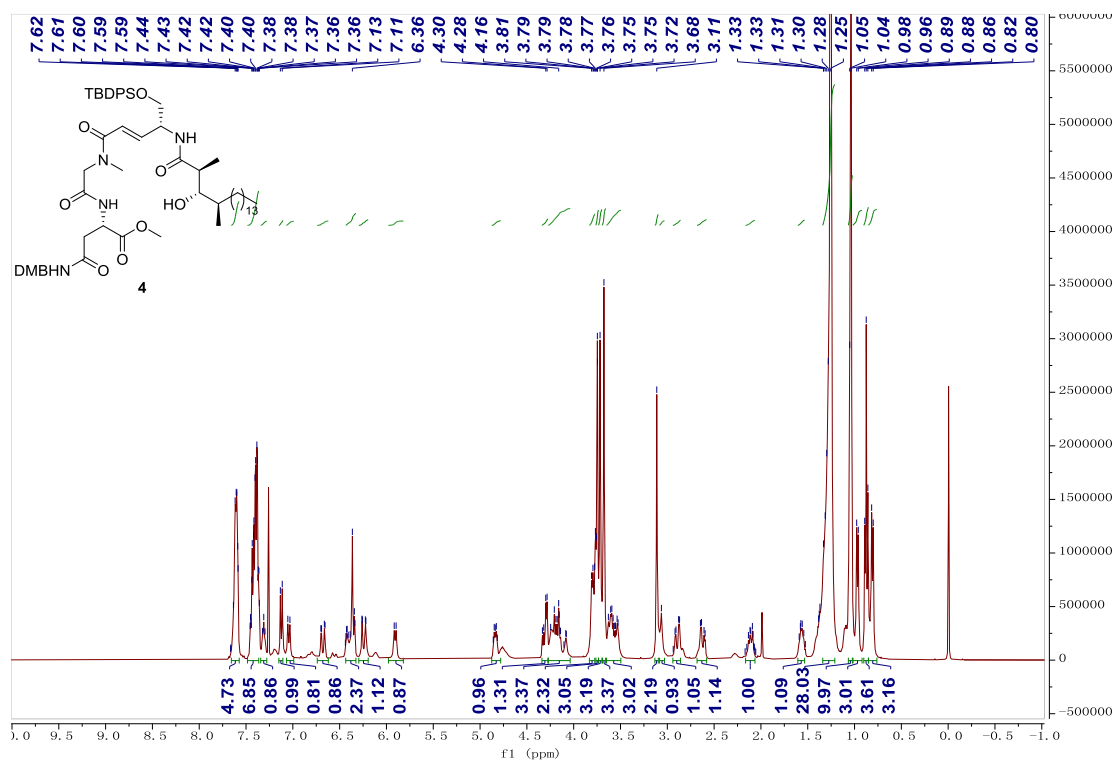

**$^{13}\text{C}$  NMR spectrum of compound 4 in  $\text{CDCl}_3$  (100 MHz).**

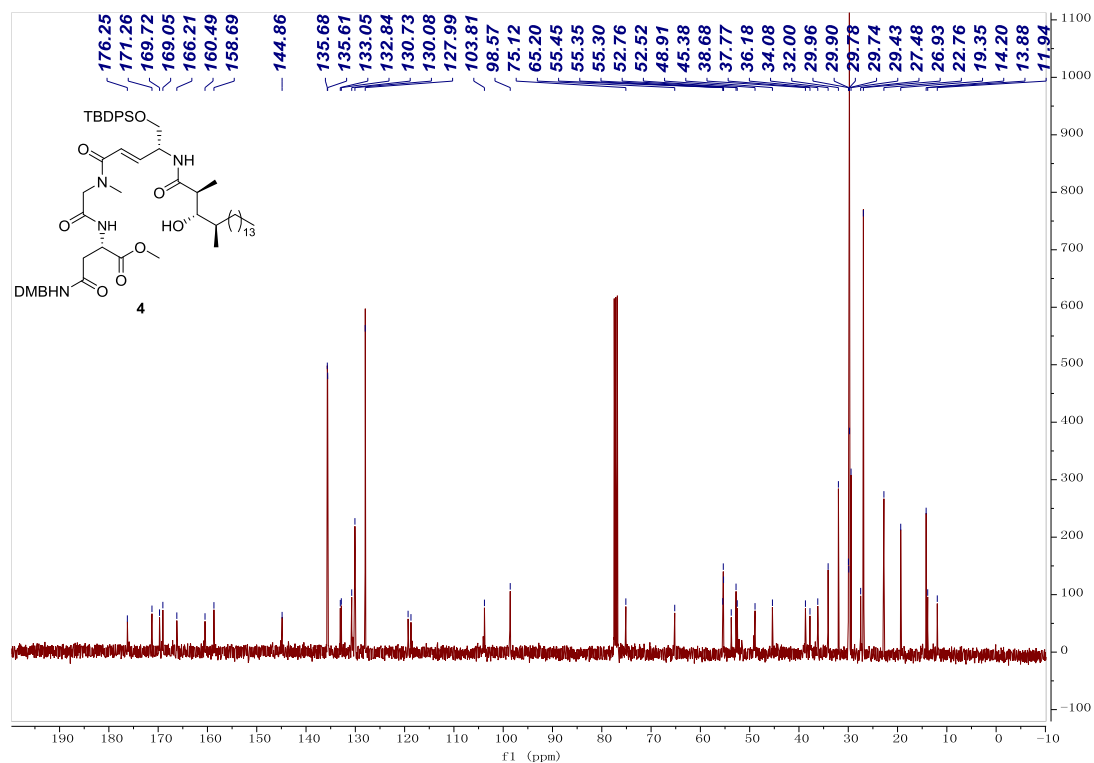

**<sup>1</sup>H NMR spectrum of compound 13 in DMSO-*d*<sub>6</sub> (400 MHz).**

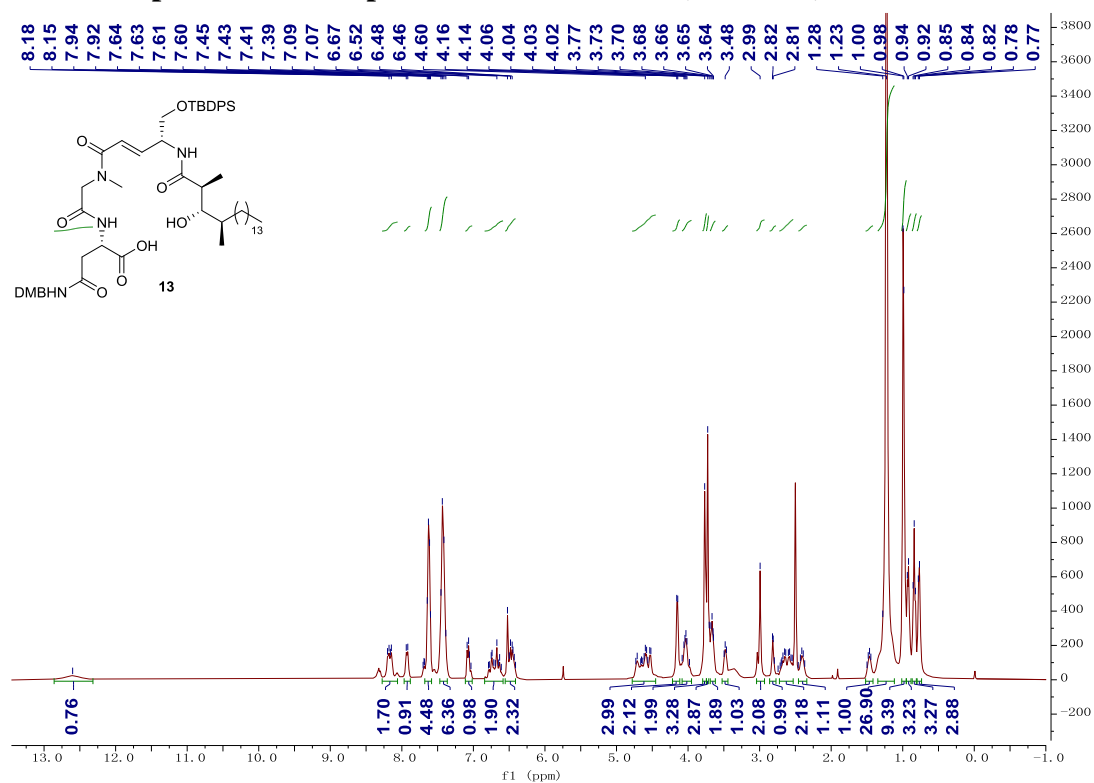

**<sup>13</sup>C NMR spectrum of compound 13 in DMSO-*d*<sub>6</sub> (100 MHz).**

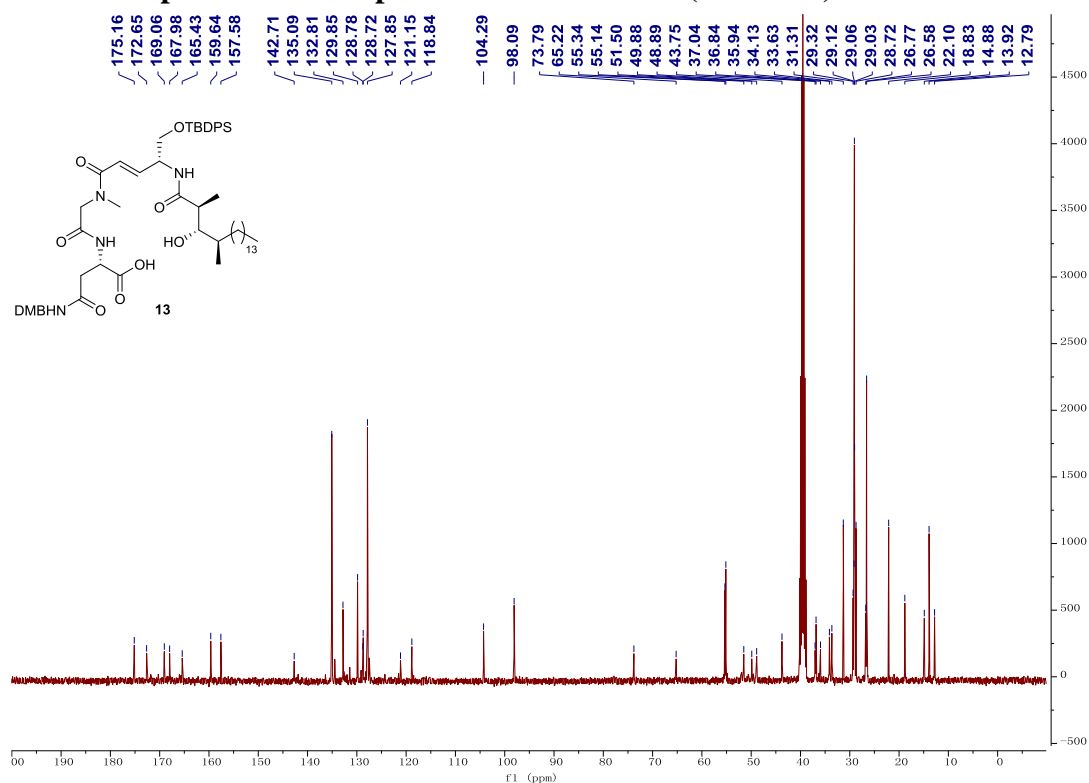

### <sup>1</sup>H NMR spectrum of compound 9b in CDCl<sub>3</sub> (400 MHz)

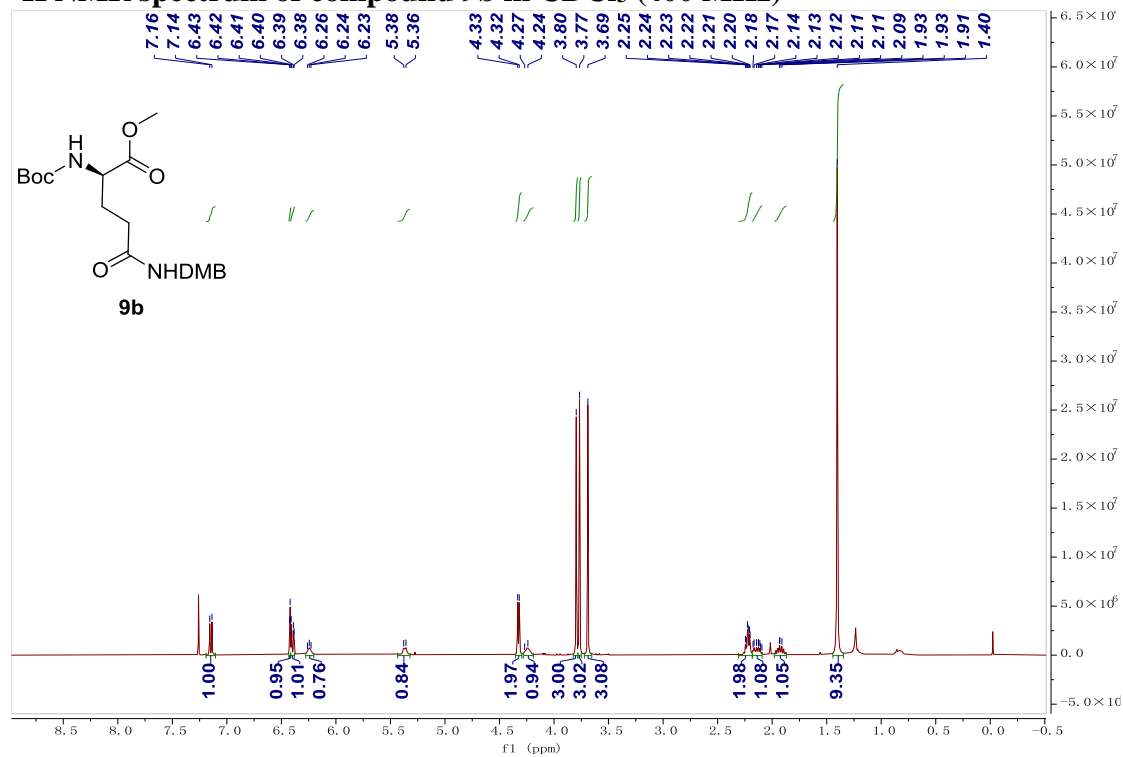

### <sup>13</sup>C NMR spectrum of compound 9b in CDCl<sub>3</sub> (100 MHz)

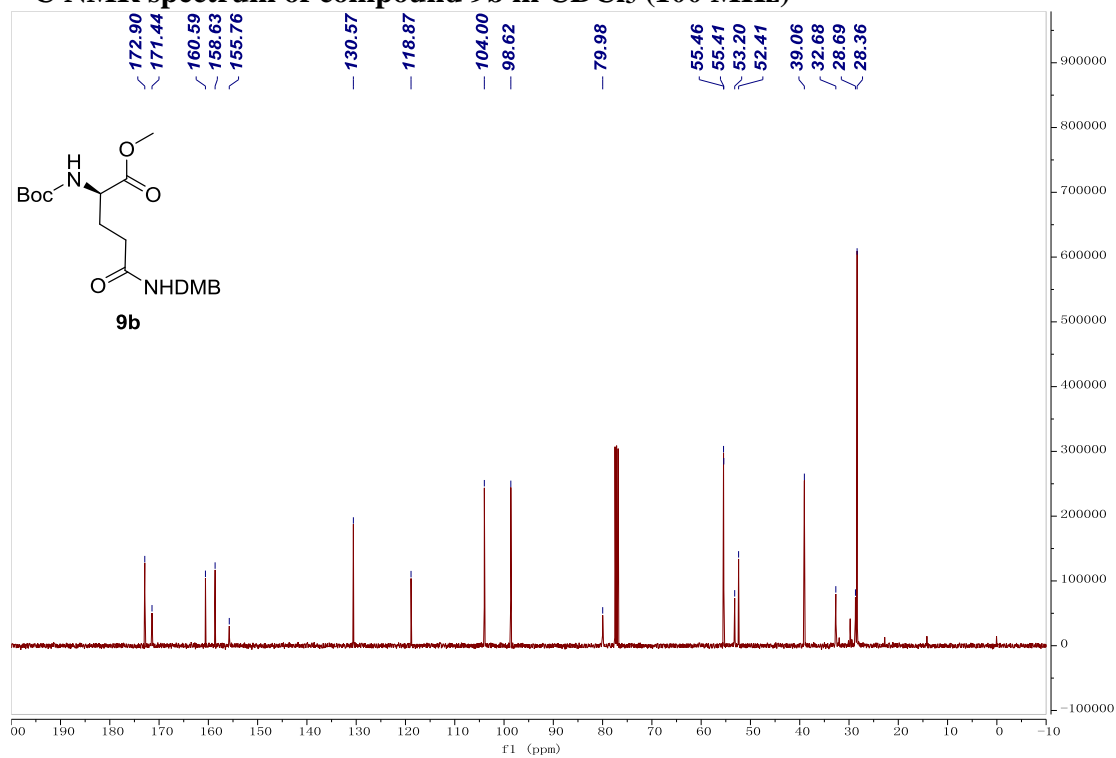

**<sup>1</sup>H NMR spectrum of compound 20 in CDCl<sub>3</sub> (400 MHz).**

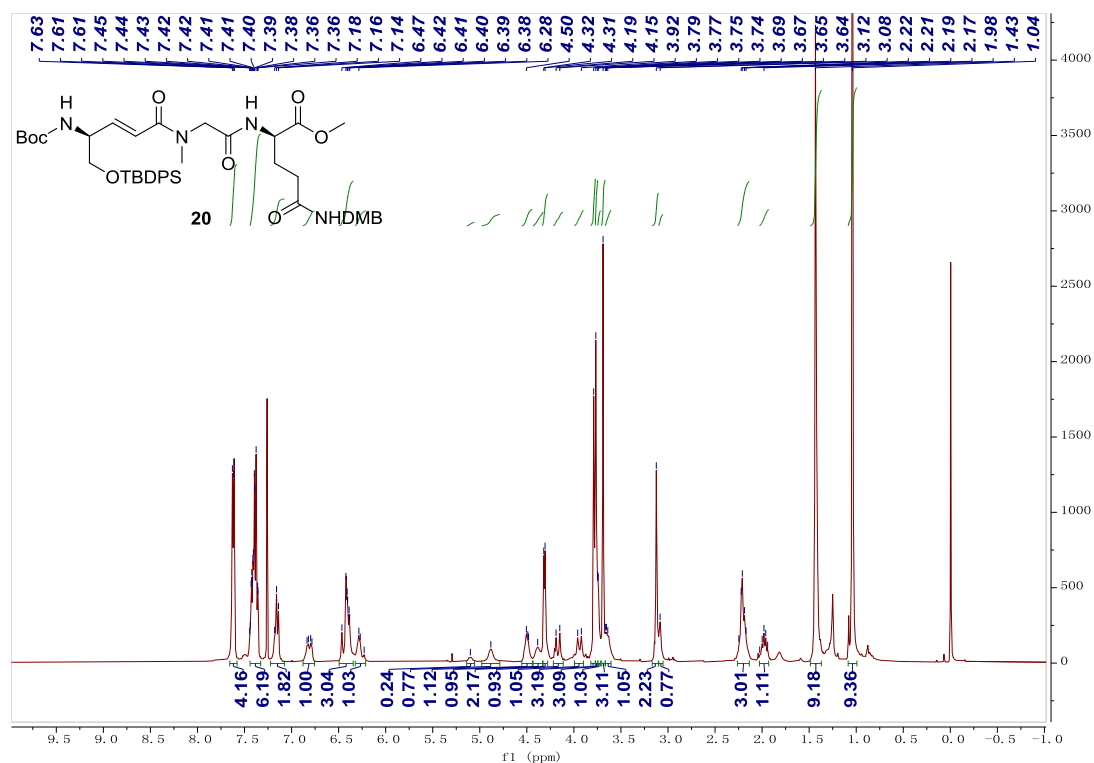

**<sup>13</sup>C NMR spectrum of compound 20 in CDCl<sub>3</sub> (100 MHz).**

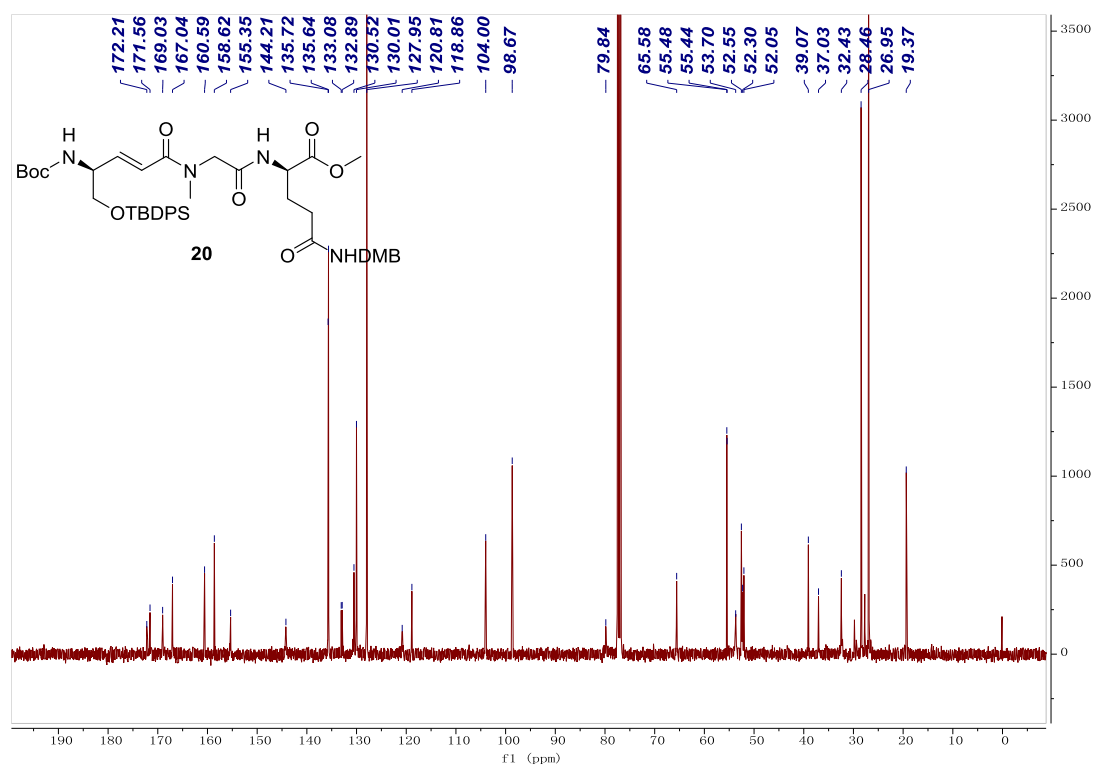

**$^1\text{H}$  NMR spectrum of compound 17 in  $\text{DMSO-}d_6$  (400 MHz).**

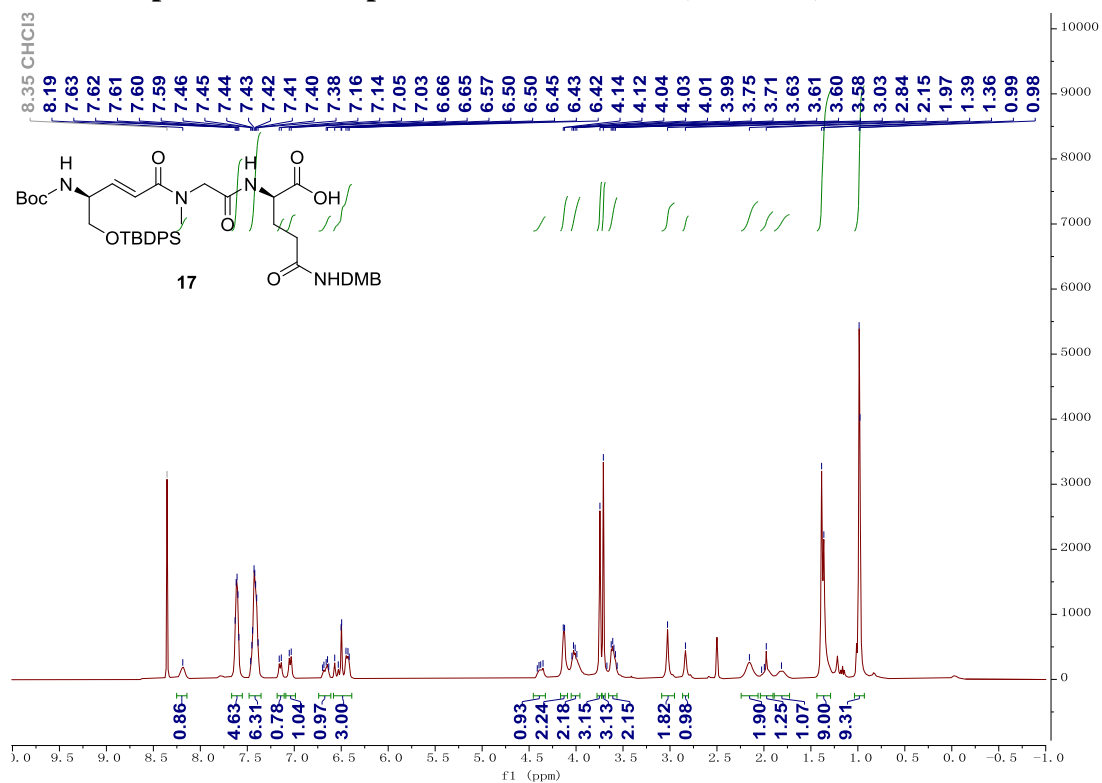

**$^{13}\text{C}$  NMR spectrum of compound 17 in  $\text{DMSO-}d_6$  (100 MHz).**

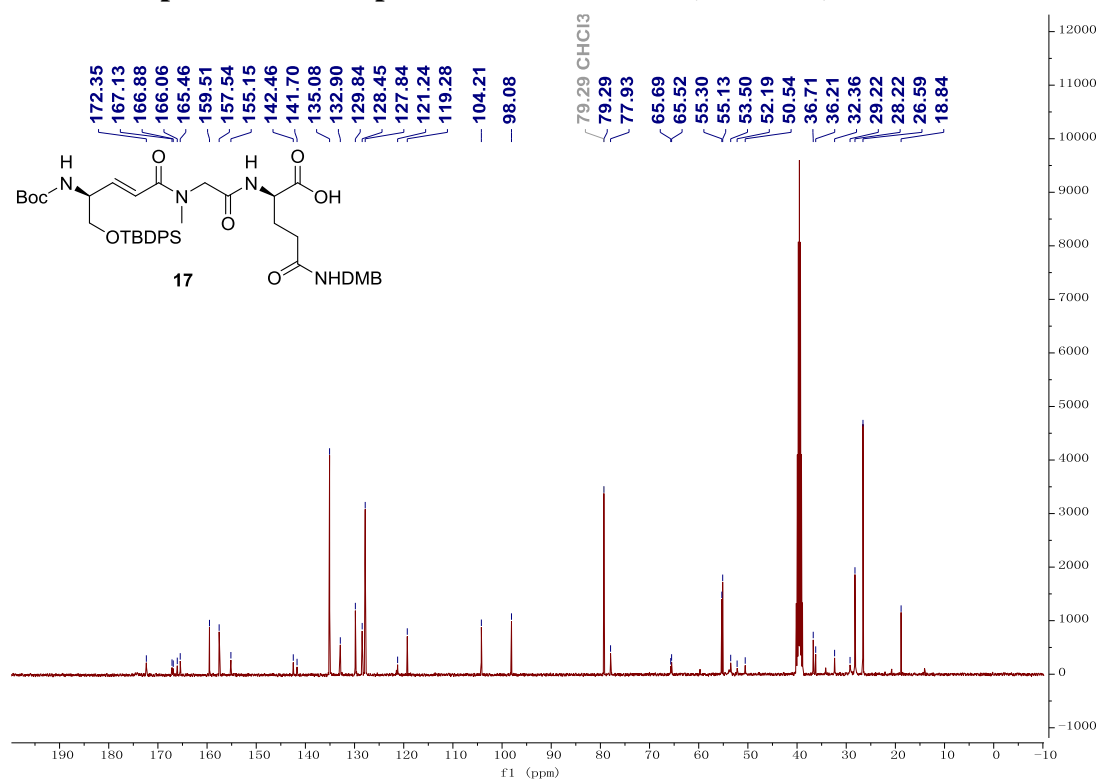

**$^1\text{H}$  NMR spectrum of compound 18 in  $\text{CDCl}_3$  (400 MHz).**

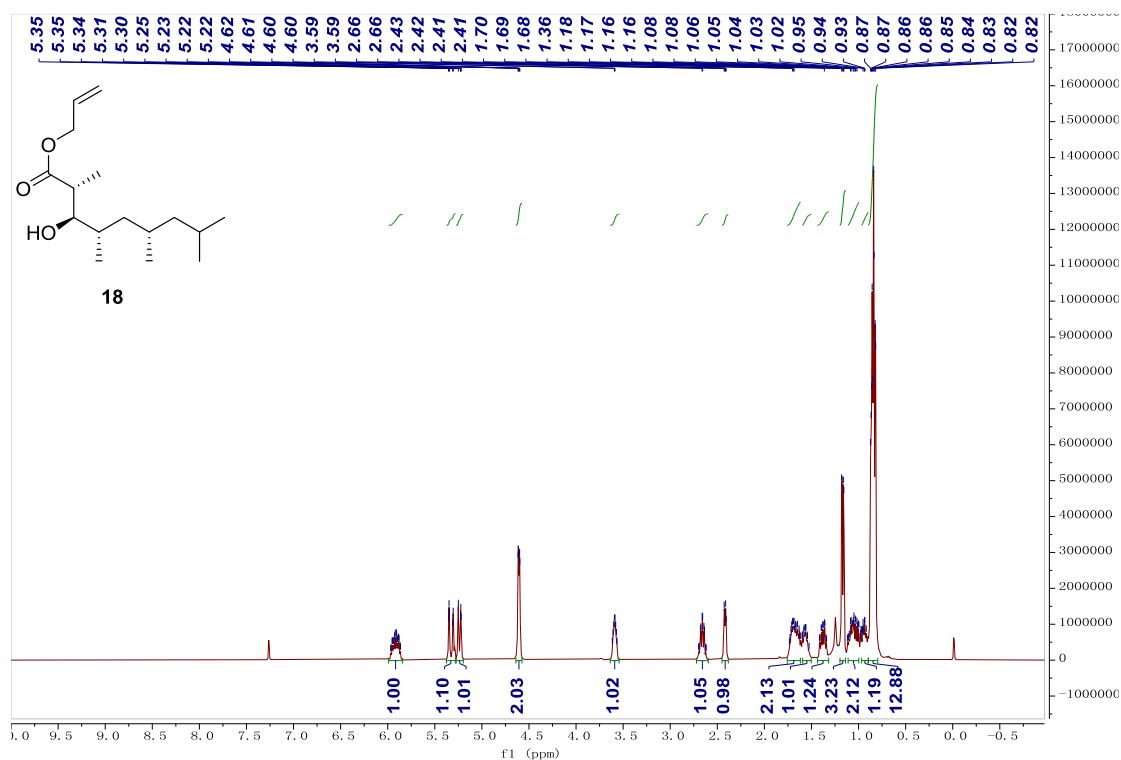

**$^{13}\text{C}$  NMR spectrum of compound 18 in  $\text{CDCl}_3$  (100 MHz)**

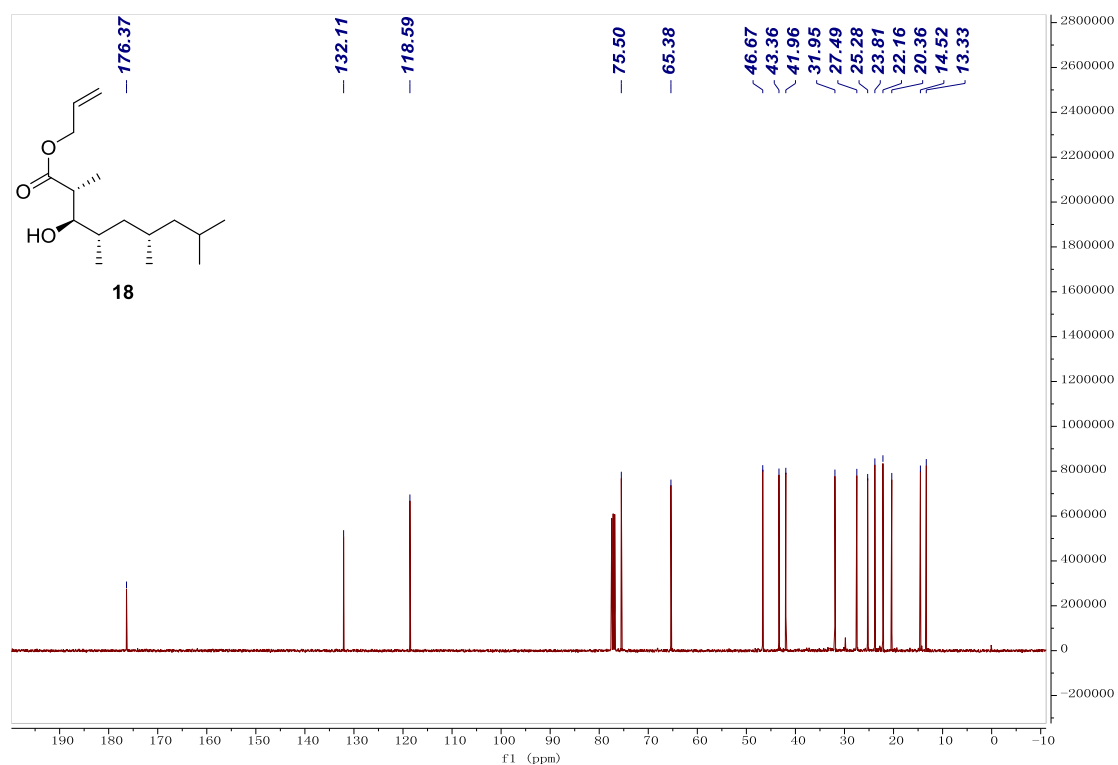

**<sup>1</sup>H NMR spectrum of compound 29 in CDCl<sub>3</sub> (400 MHz)**

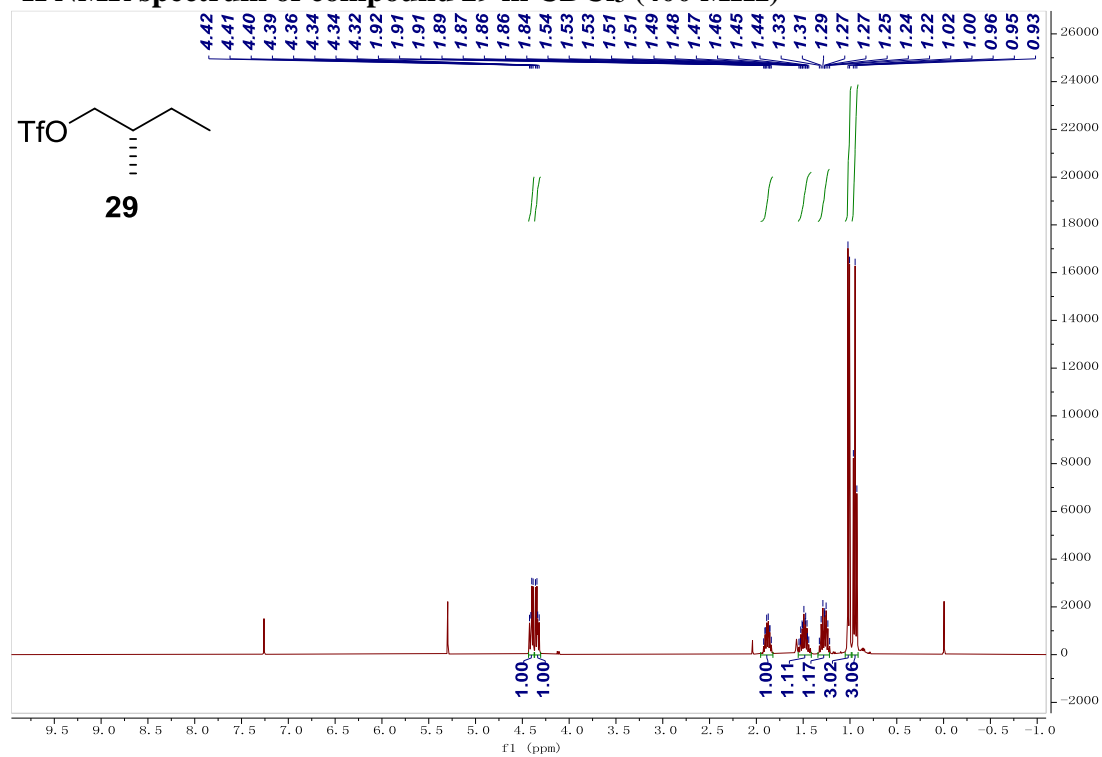

**<sup>13</sup>C NMR spectrum of compound 29 in CDCl<sub>3</sub> (100 MHz)**

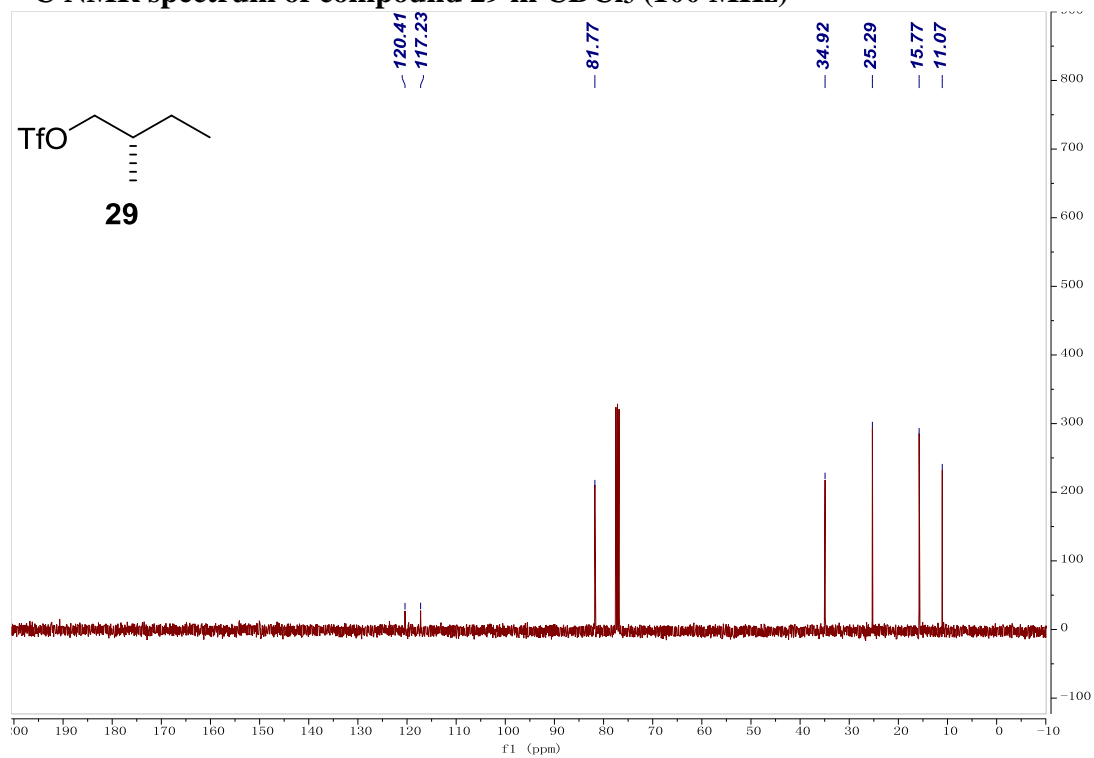



**<sup>19</sup>F NMR spectrum of compound 29 in CDCl<sub>3</sub> (375 MHz)**

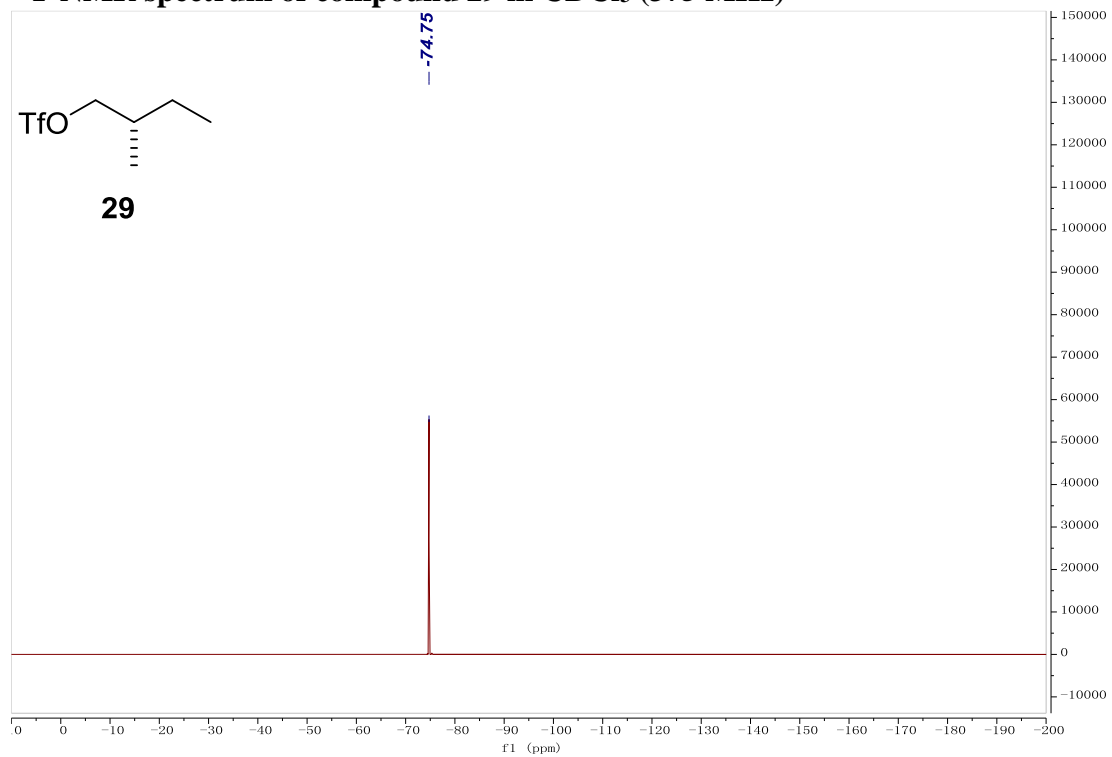

### <sup>1</sup>H NMR spectrum of compound 31 in CDCl<sub>3</sub> (400 MHz)

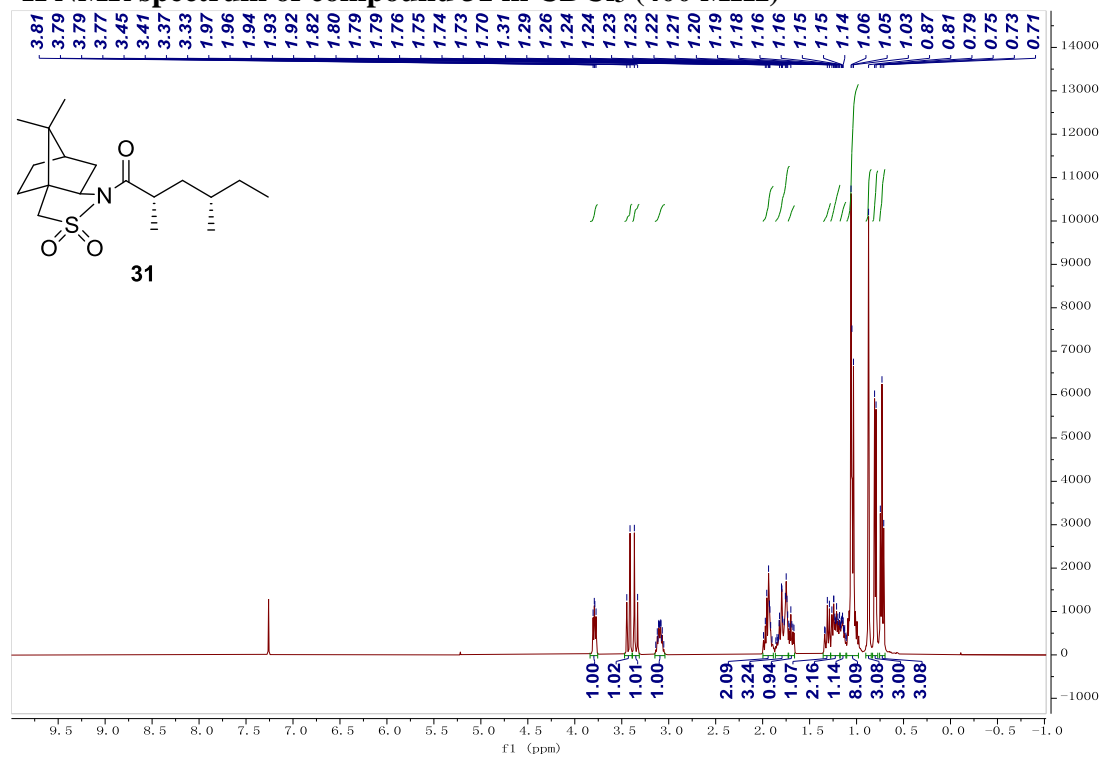

### <sup>13</sup>C NMR spectrum of compound 31 in CDCl<sub>3</sub> (100 MHz)

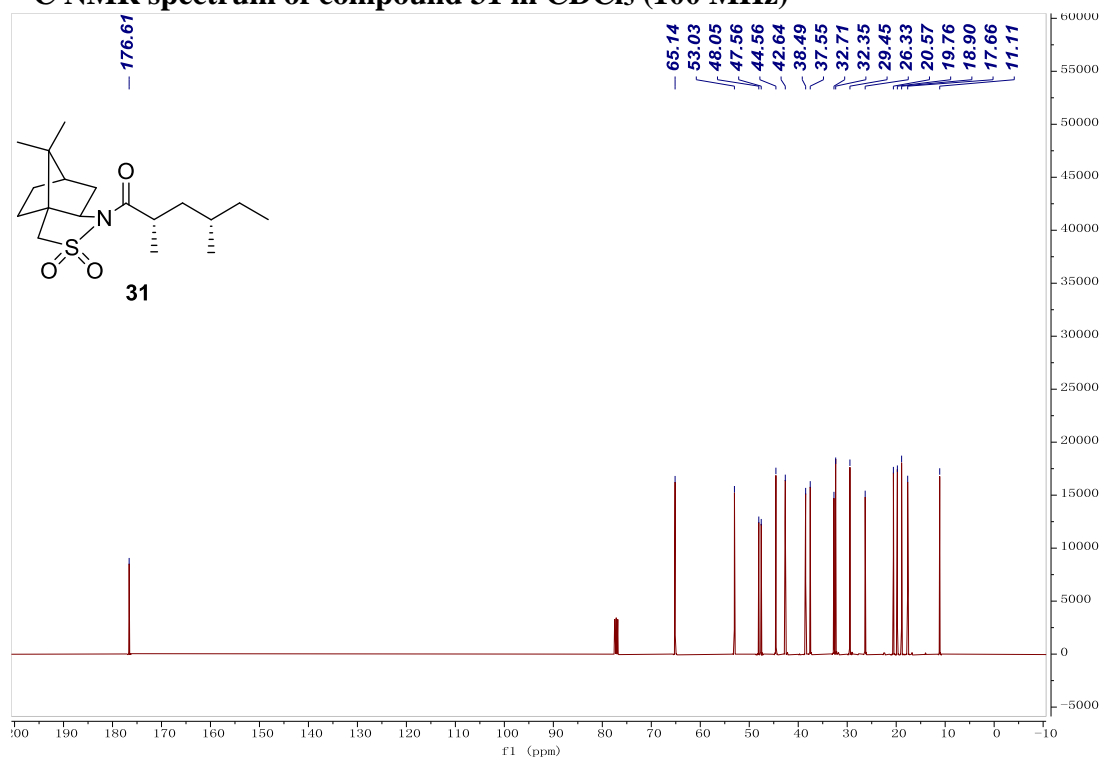

### <sup>1</sup>H NMR spectrum of compound 33 in CDCl<sub>3</sub> (400 MHz)

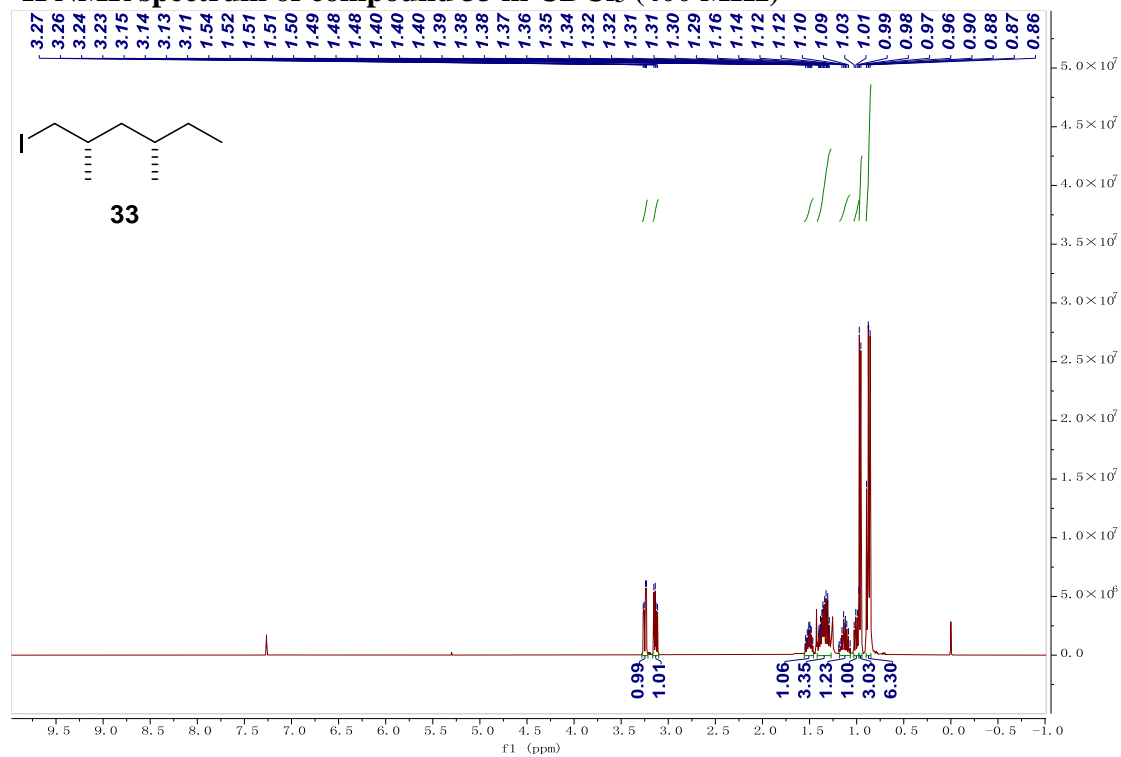

### <sup>13</sup>C NMR spectrum of compound 33 in CDCl<sub>3</sub> (100 MHz)

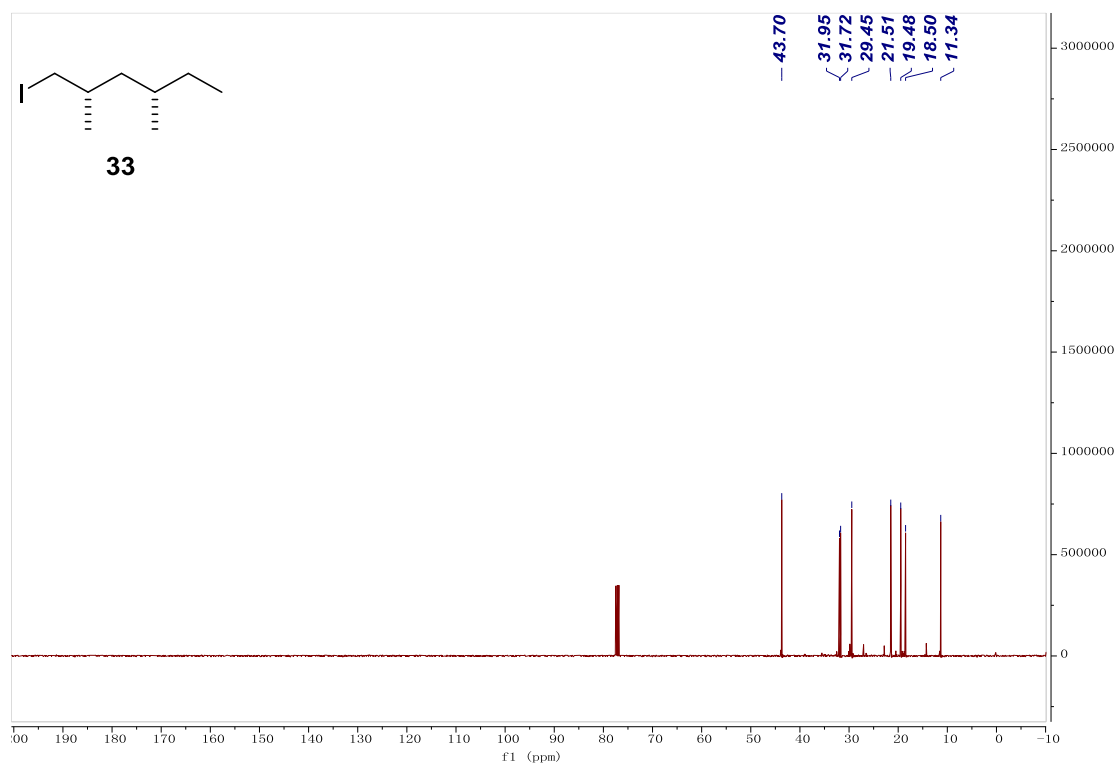

### <sup>1</sup>H NMR spectrum of compound 35 in CDCl<sub>3</sub> (400 MHz)

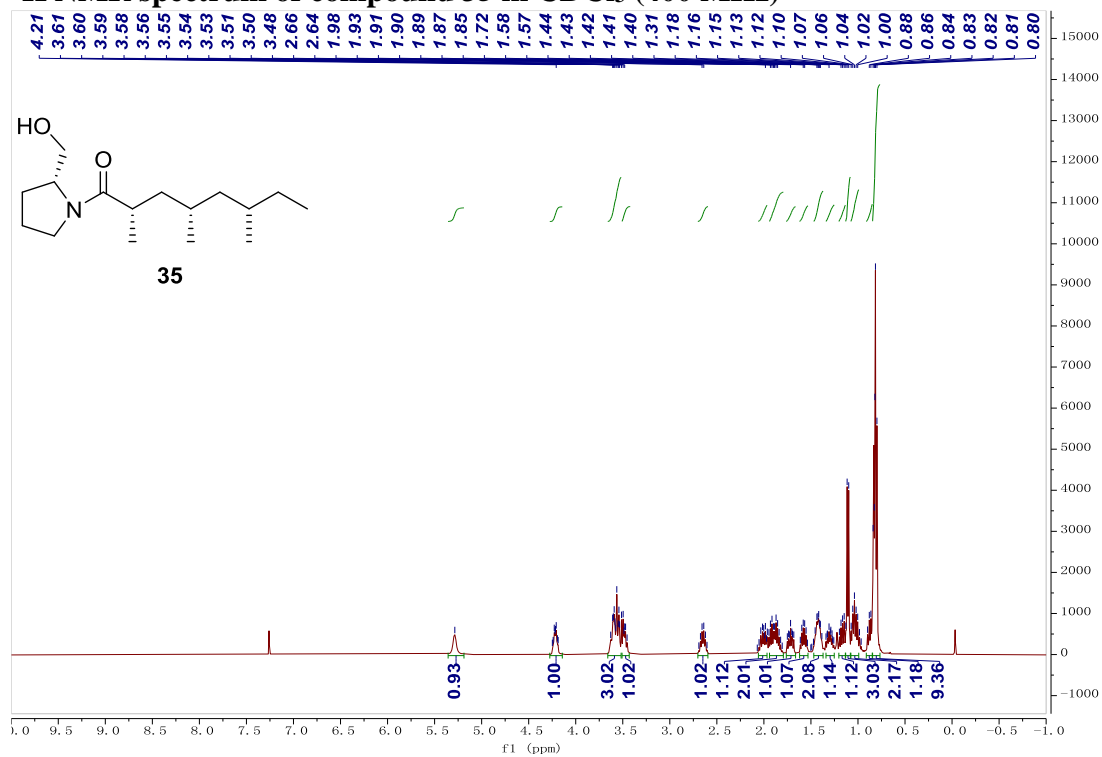

### <sup>13</sup>C NMR spectrum of compound 35 in CDCl<sub>3</sub> (100 MHz)

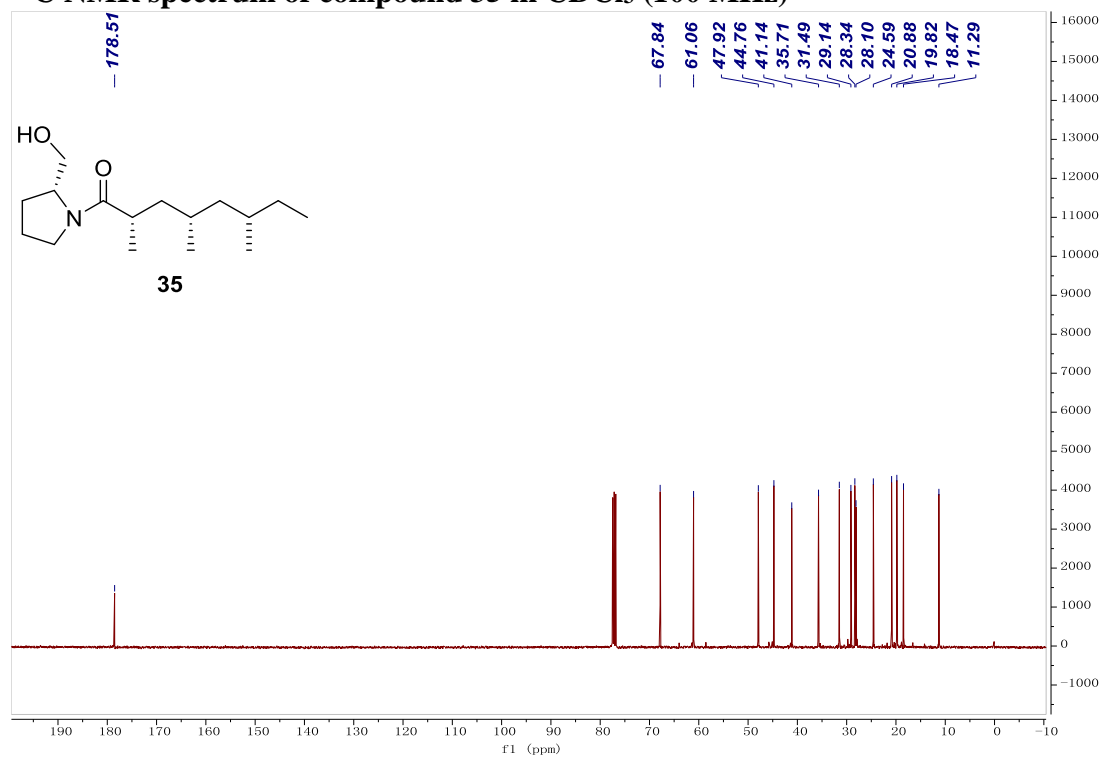

**<sup>1</sup>H NMR spectrum of compound 36 in CDCl<sub>3</sub> (400 MHz).**

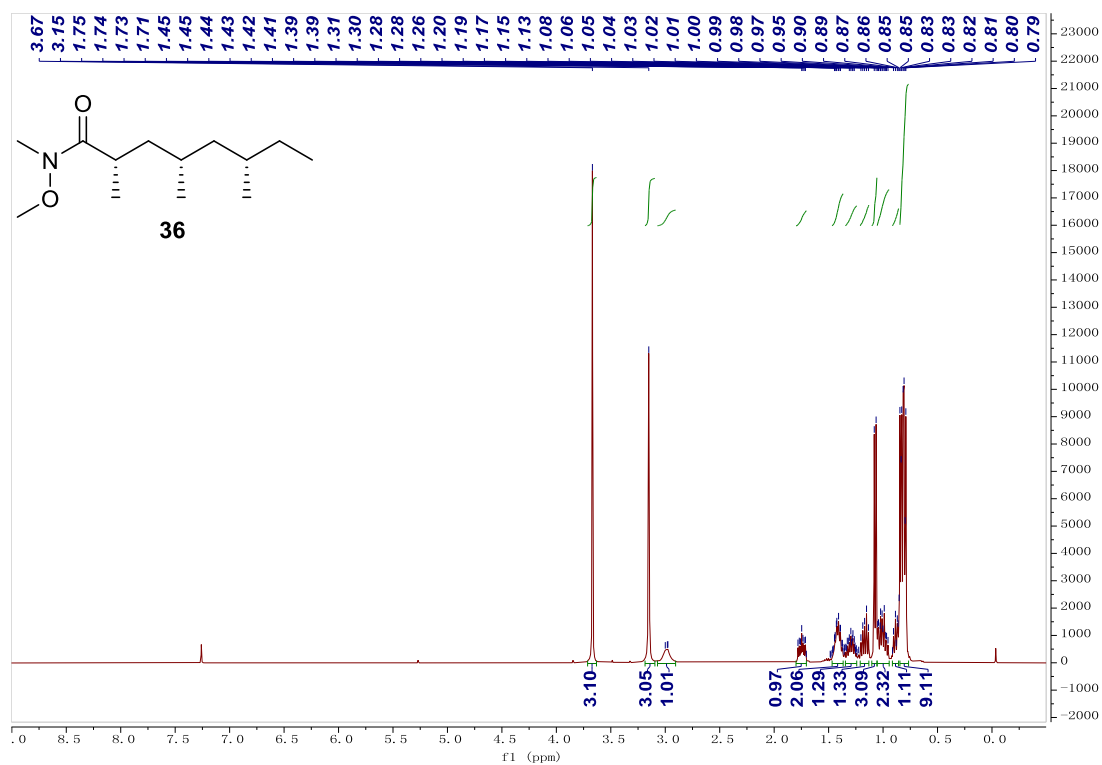

**<sup>13</sup>C NMR spectrum of compound 36 in CDCl<sub>3</sub> (100 MHz).**

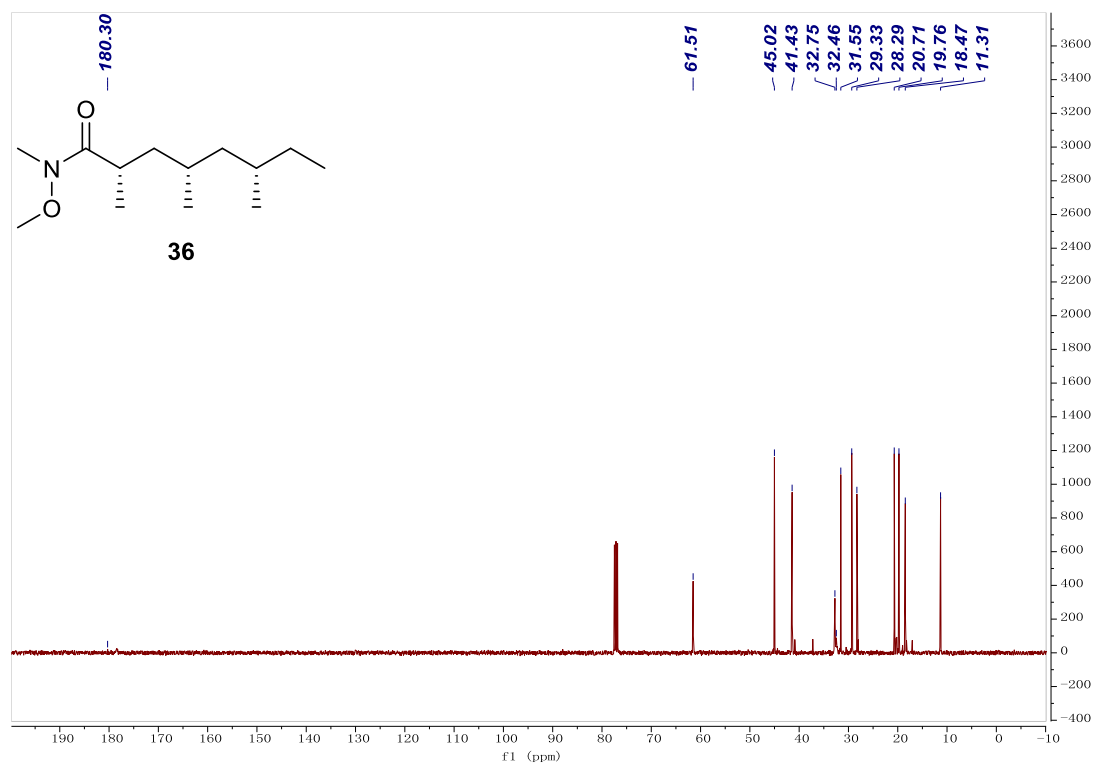

### <sup>1</sup>H NMR spectrum of compound 26 in CDCl<sub>3</sub> (400 MHz)

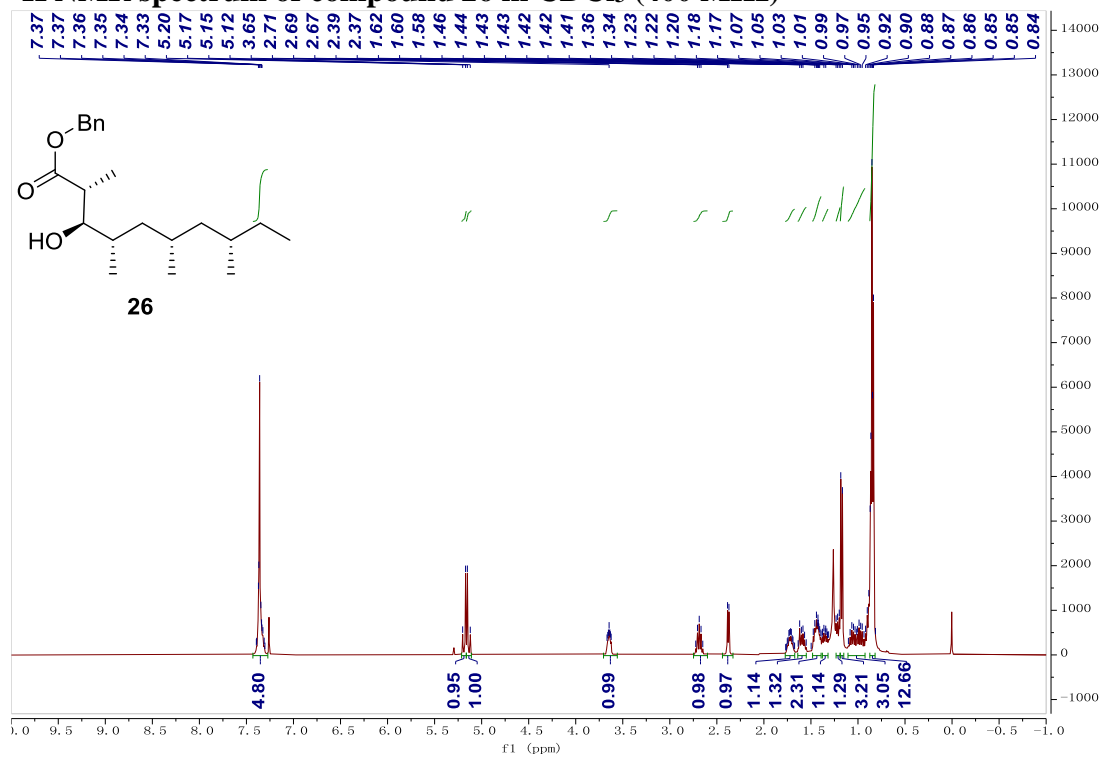

### <sup>13</sup>C NMR spectrum of compound 26 in CDCl<sub>3</sub> (100 MHz)

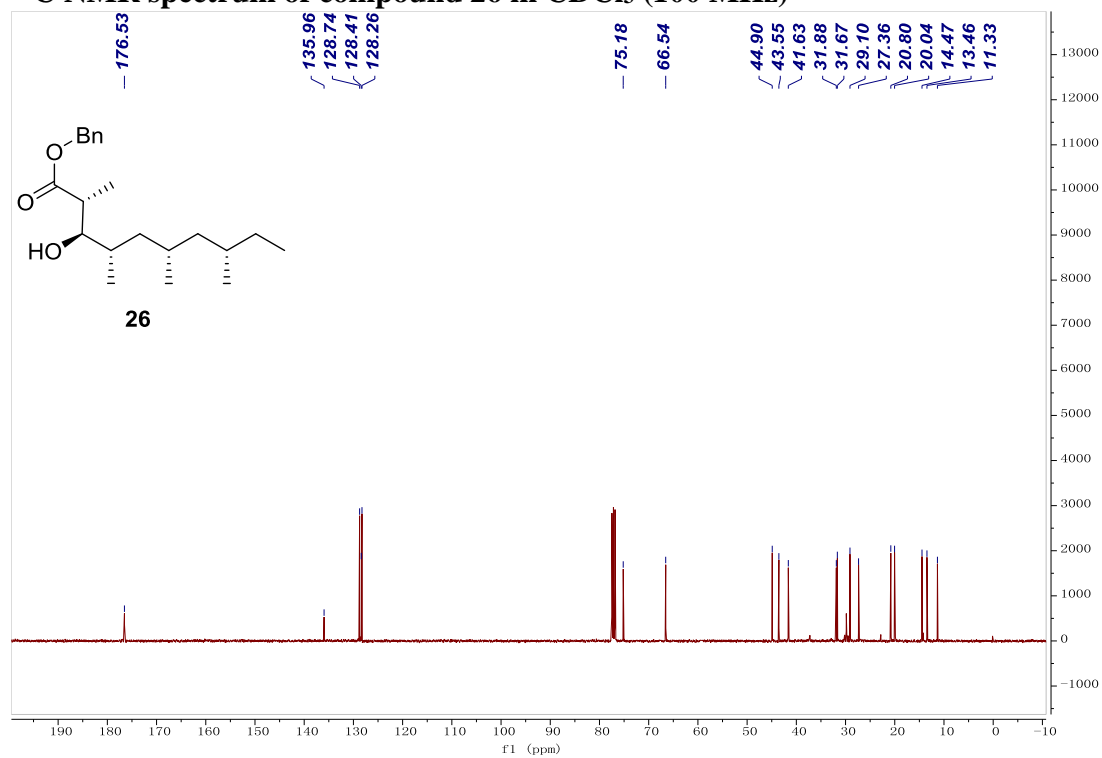

### <sup>1</sup>H NMR spectrum of compound 40 in CDCl<sub>3</sub> (400 MHz)

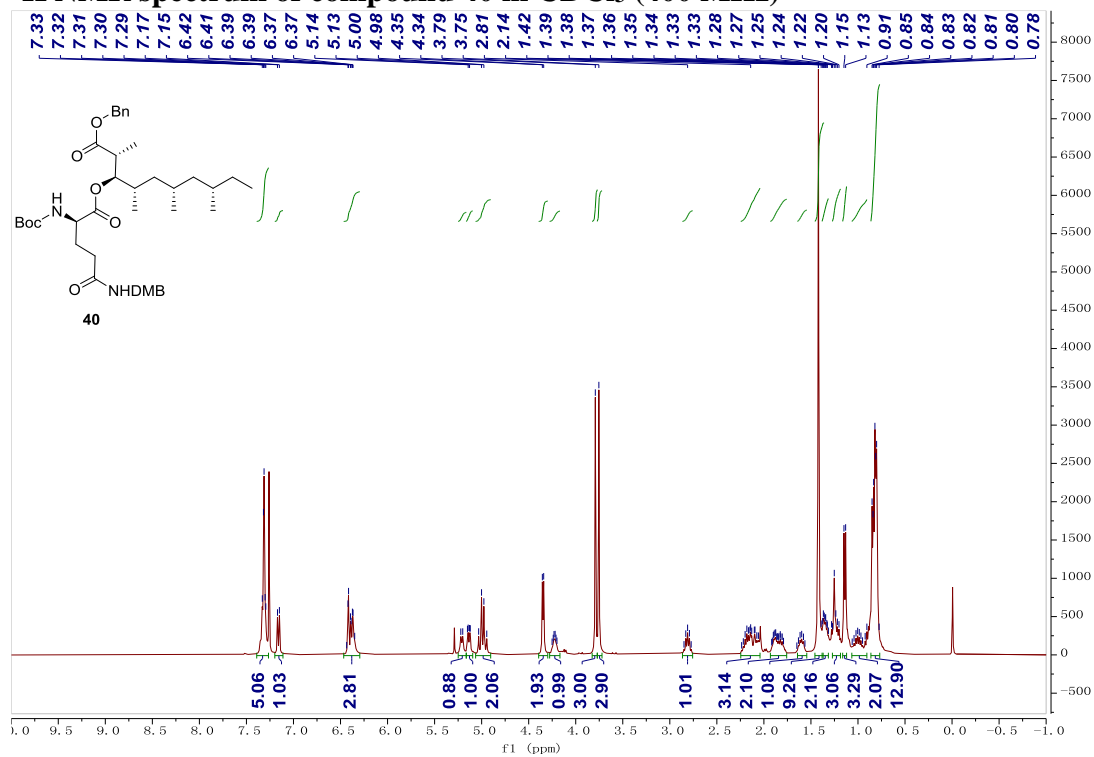

### <sup>13</sup>C NMR spectrum of compound 40 in CDCl<sub>3</sub> (100 MHz)

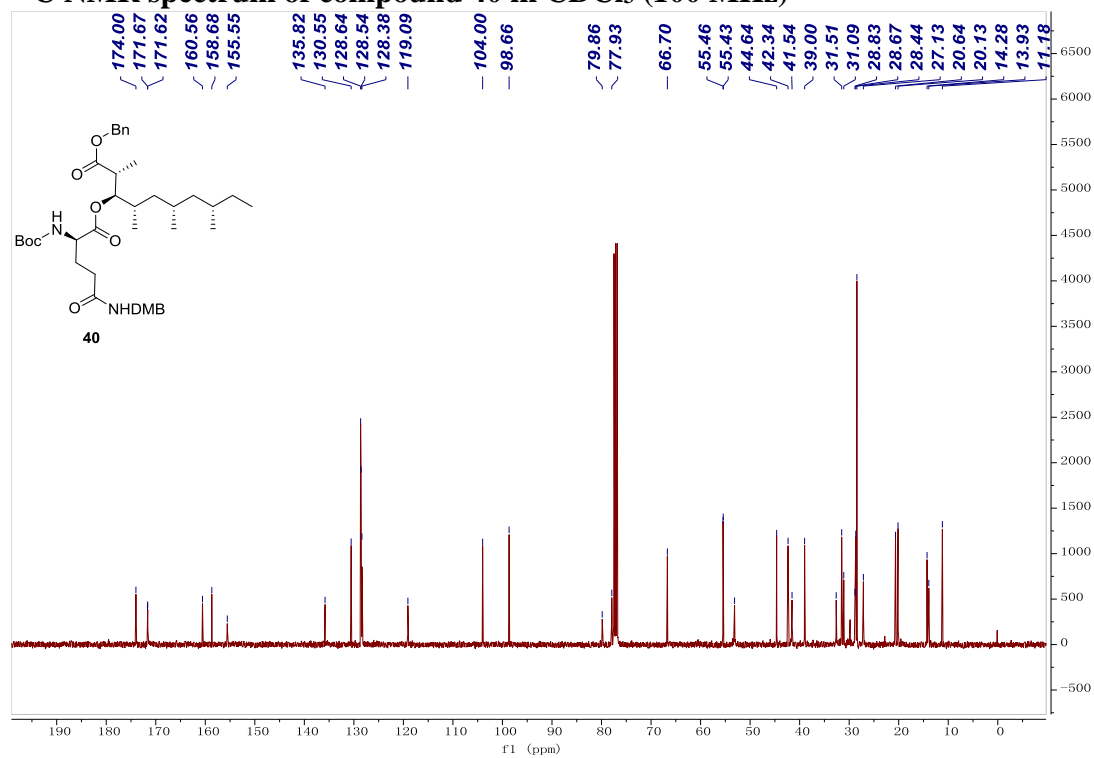

### <sup>1</sup>H NMR spectrum of compound 24 in CDCl<sub>3</sub> (400 MHz)

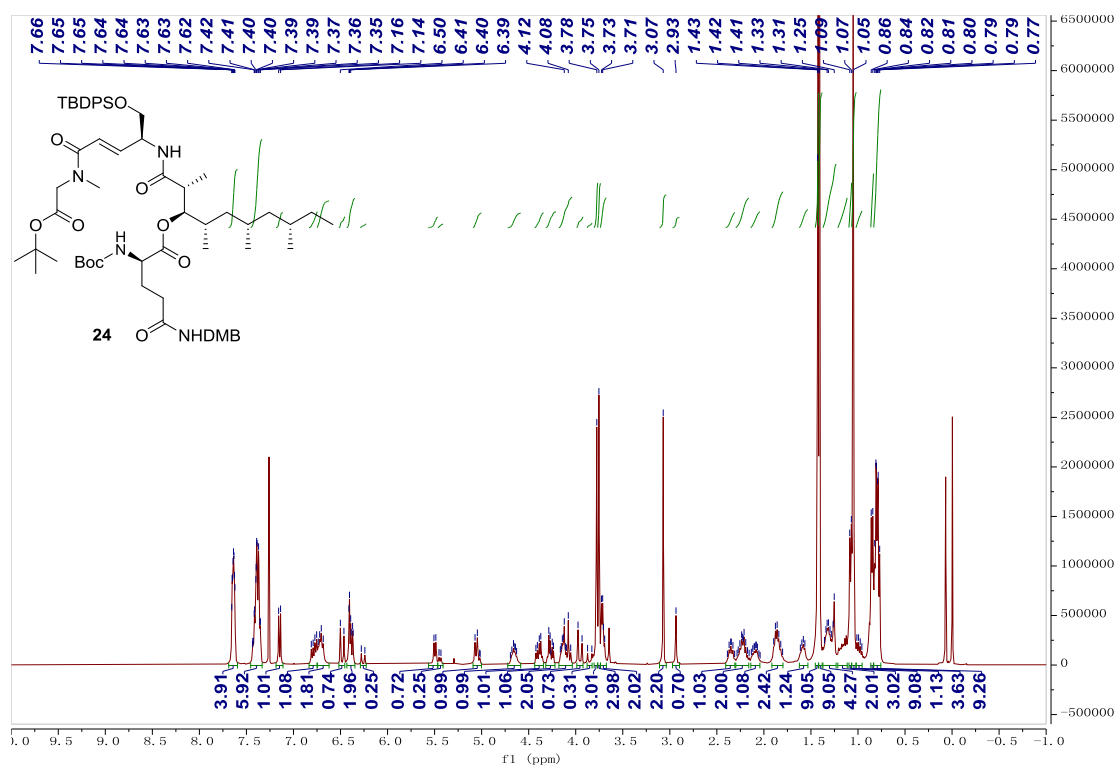

### <sup>13</sup>C NMR spectrum of compound 24 in CDCl<sub>3</sub> (100 MHz)

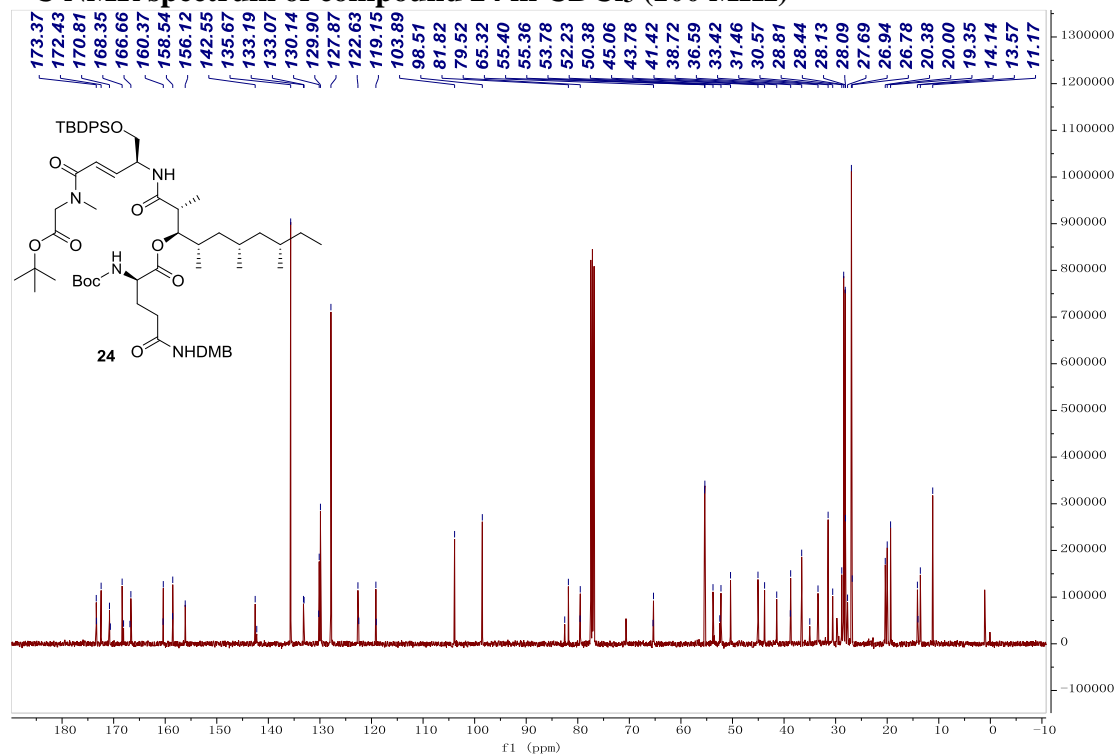



### <sup>1</sup>H NMR spectrum of compound 23 in DMSO-*d*<sub>6</sub> (400 MHz)

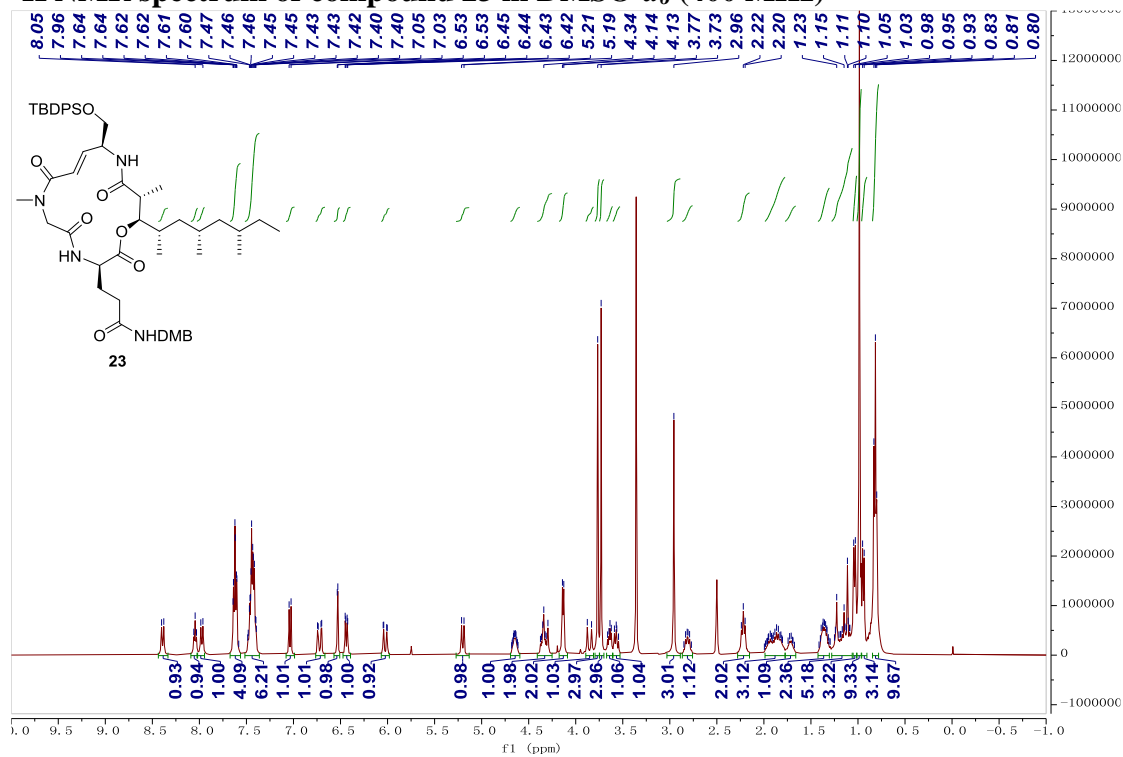

### <sup>13</sup>C NMR spectrum of compound 23 in DMSO-*d*<sub>6</sub> (100 MHz)

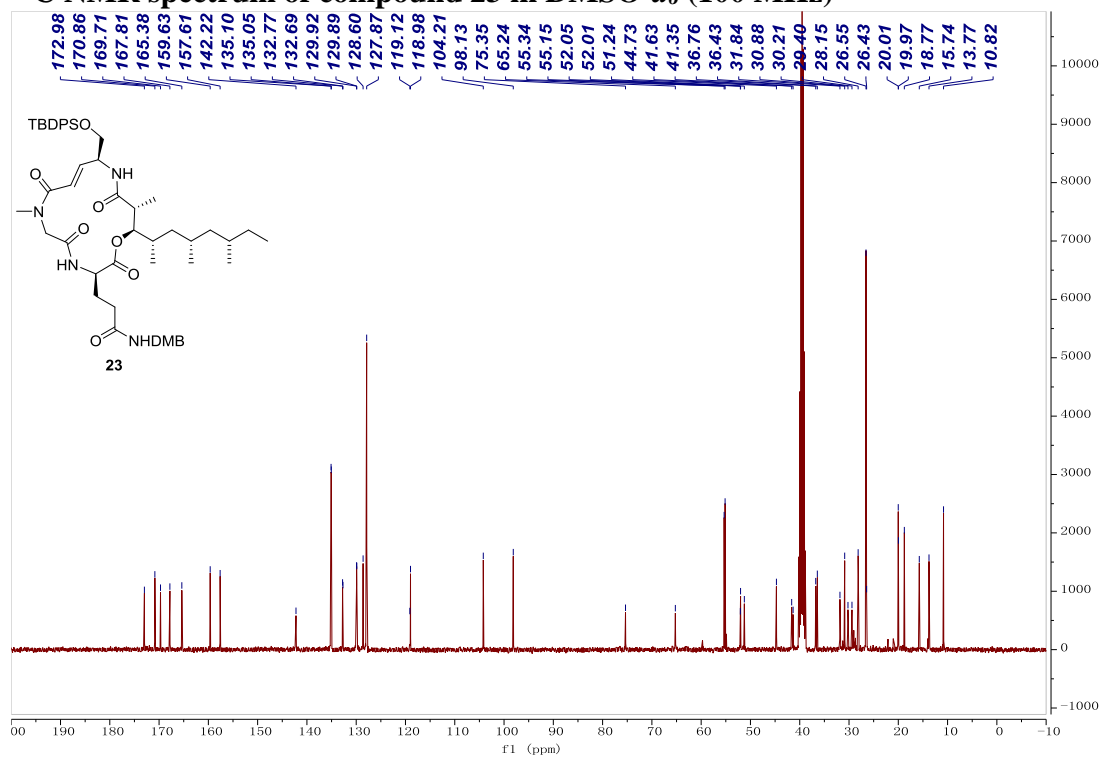

### $^1\text{H}$ NMR spectrum of compound 41 in $\text{DMSO-}d_6$ (400 MHz)

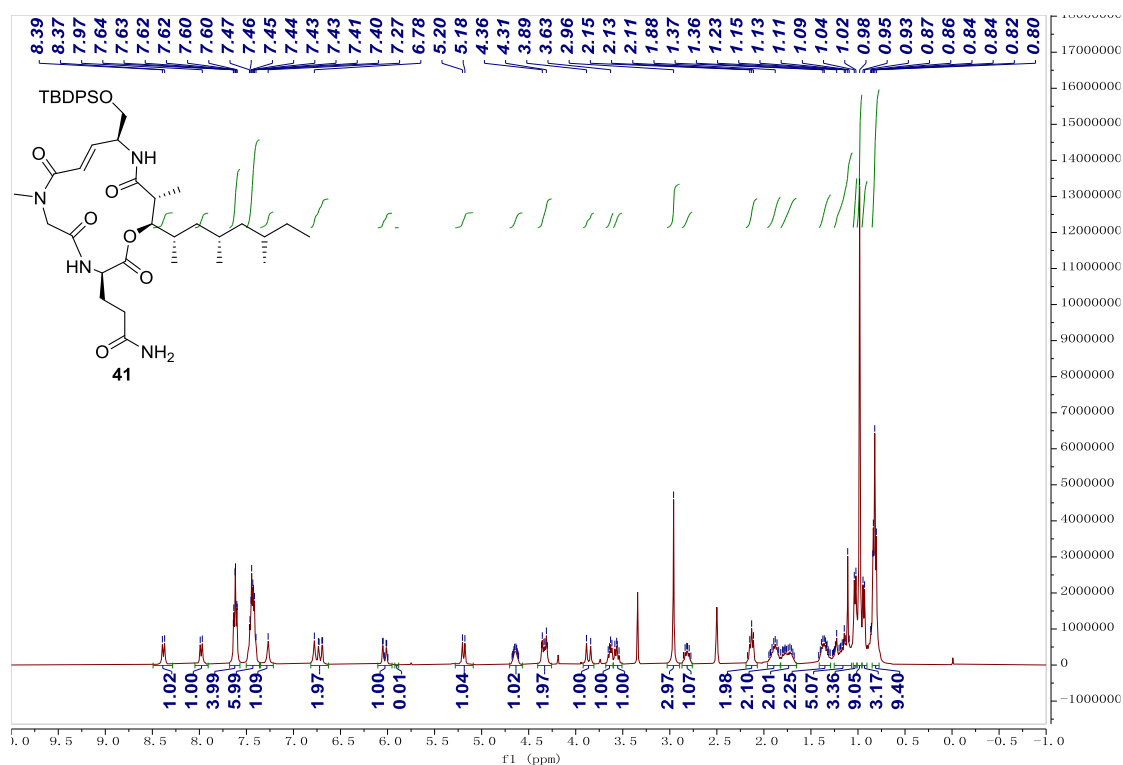

### $^{13}\text{C}$ NMR spectrum of compound 41 in $\text{DMSO-}d_6$ (100 MHz)

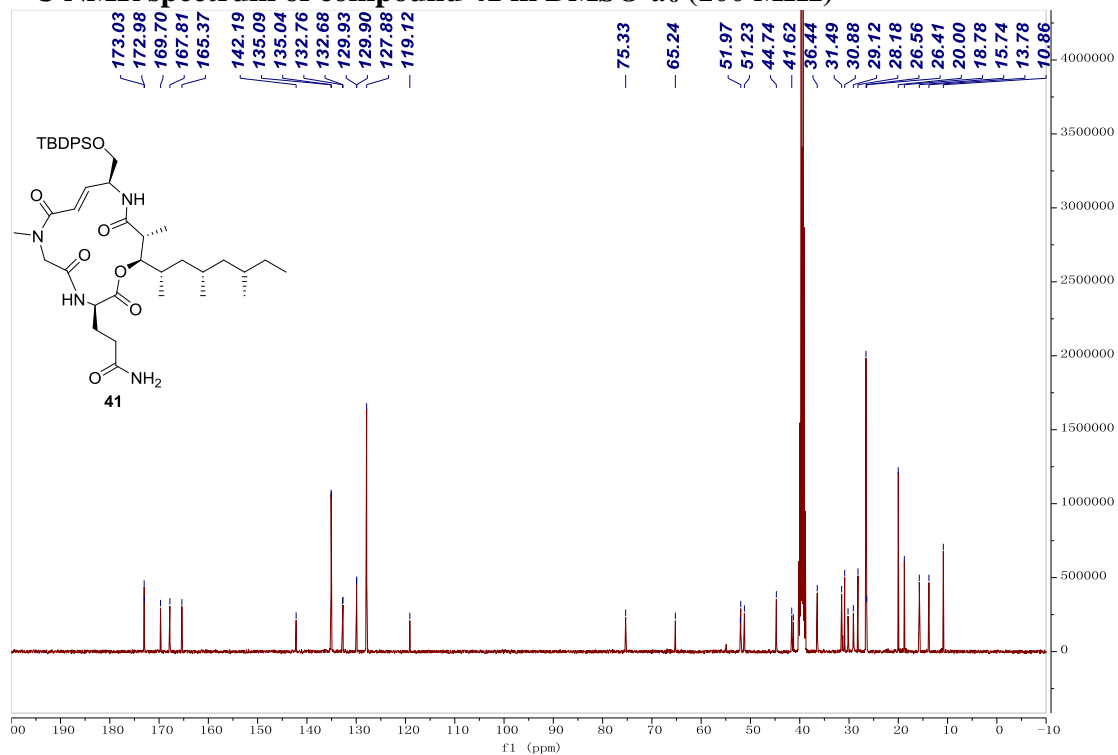

### <sup>1</sup>H NMR spectrum of compound 22 in DMSO-d<sub>6</sub> (400 MHz)

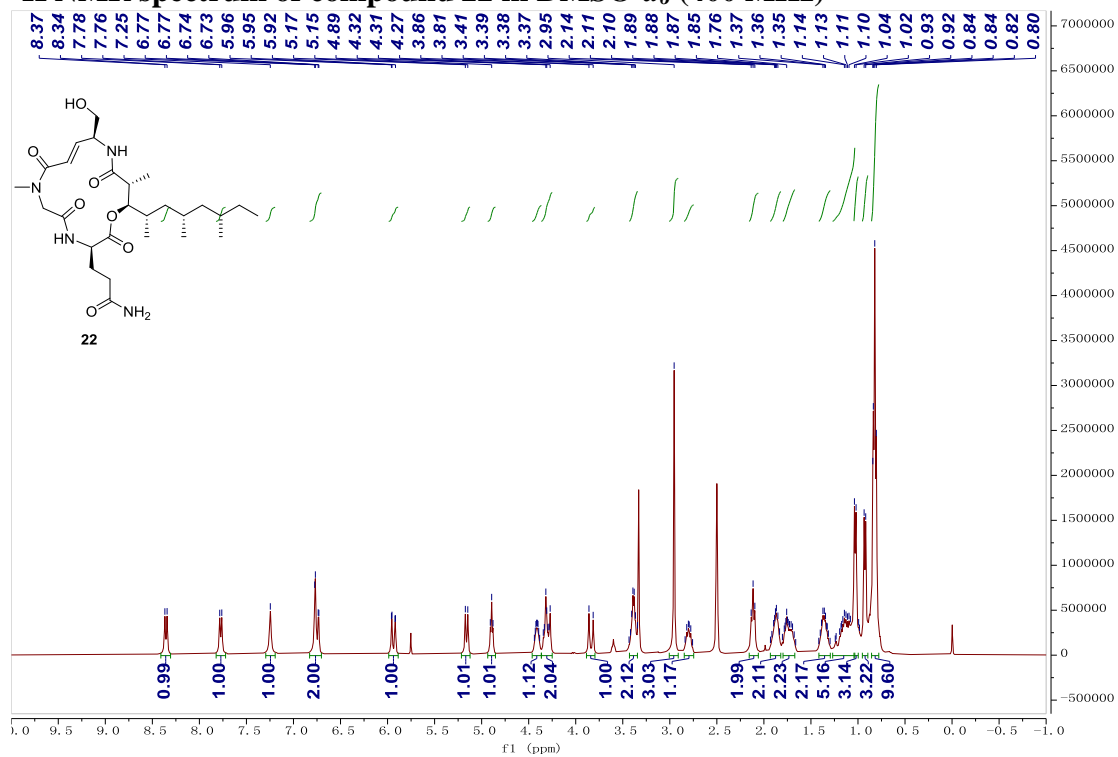

### <sup>13</sup>C NMR spectrum of compound 22 in DMSO-d<sub>6</sub> (100 MHz)

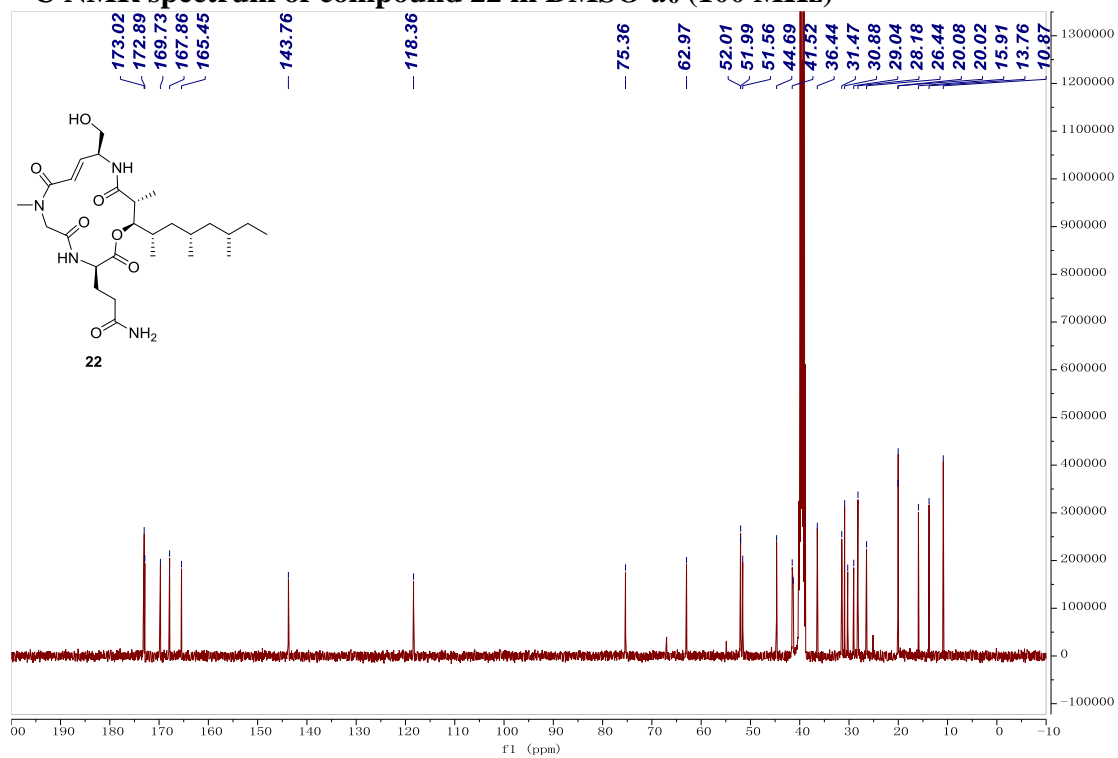



### $^1\text{H}$ NMR spectrum comparison of pure and crude rakicidin F (1) in $\text{MeOD-}d_4$ (400 MHz)

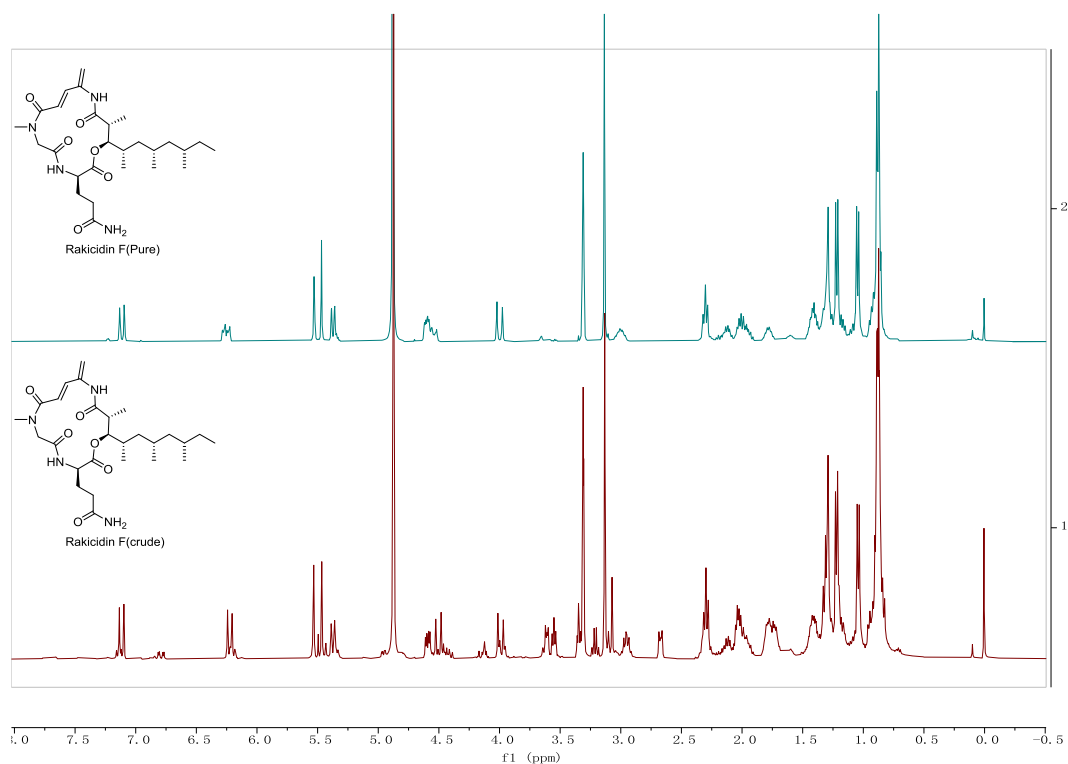

### COSY spectrum of rakicidin F (1) in $\text{MeOD-}d_4$

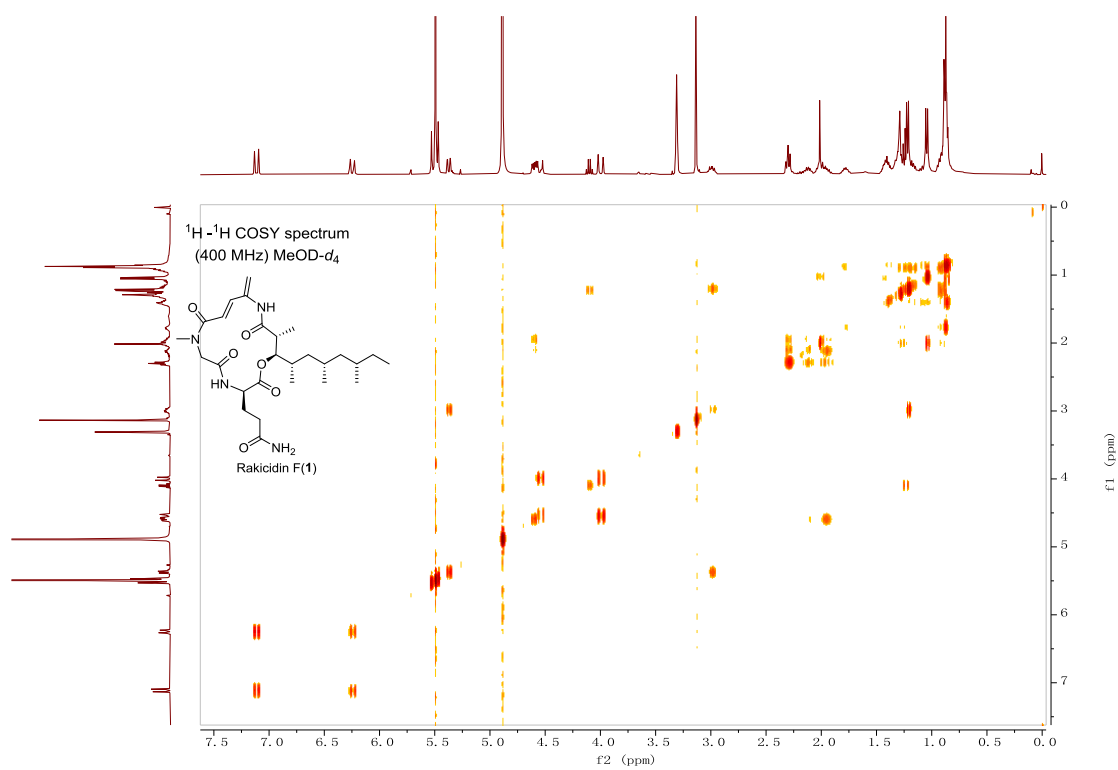

## HSQC spectrum of rakicidin F (1) in MeOD-*d*<sub>4</sub>

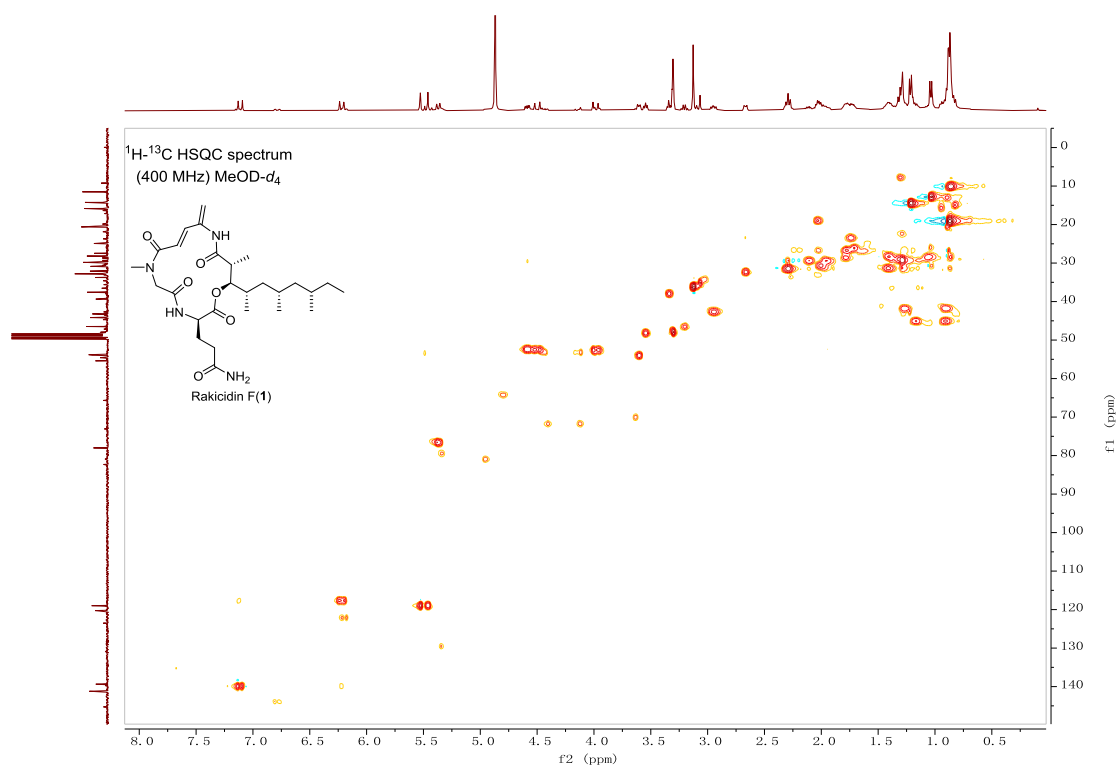

## HMBC spectrum of rakicidin F (1) in MeOD-*d*<sub>4</sub>

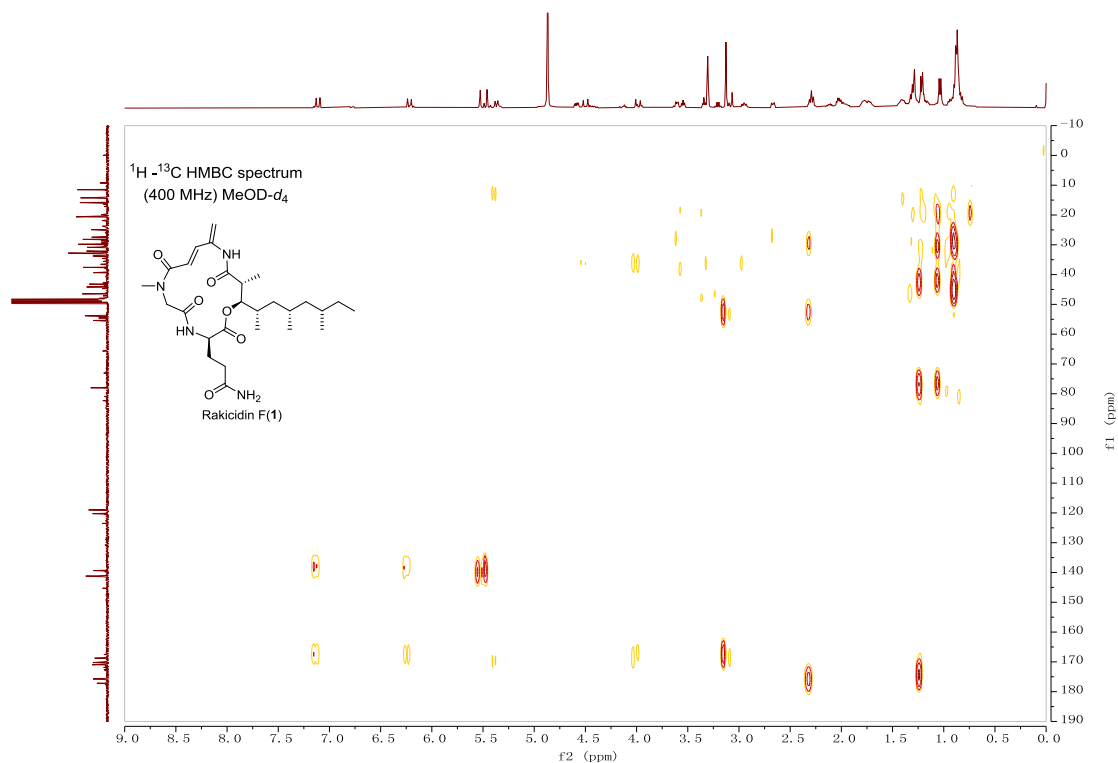

## 6. Copies of IR and HRMS Spectrum for Rakicidin F

### HRMS Spectrum for Rakicidin F (1)

HFZ-RF #28-31 RT: 0.12-0.14 AV: 4 SB: 50 0.68-0.89 NL: 5.57E7  
T: FTMS + p ESI Full ms [100.0000-1500.0000]

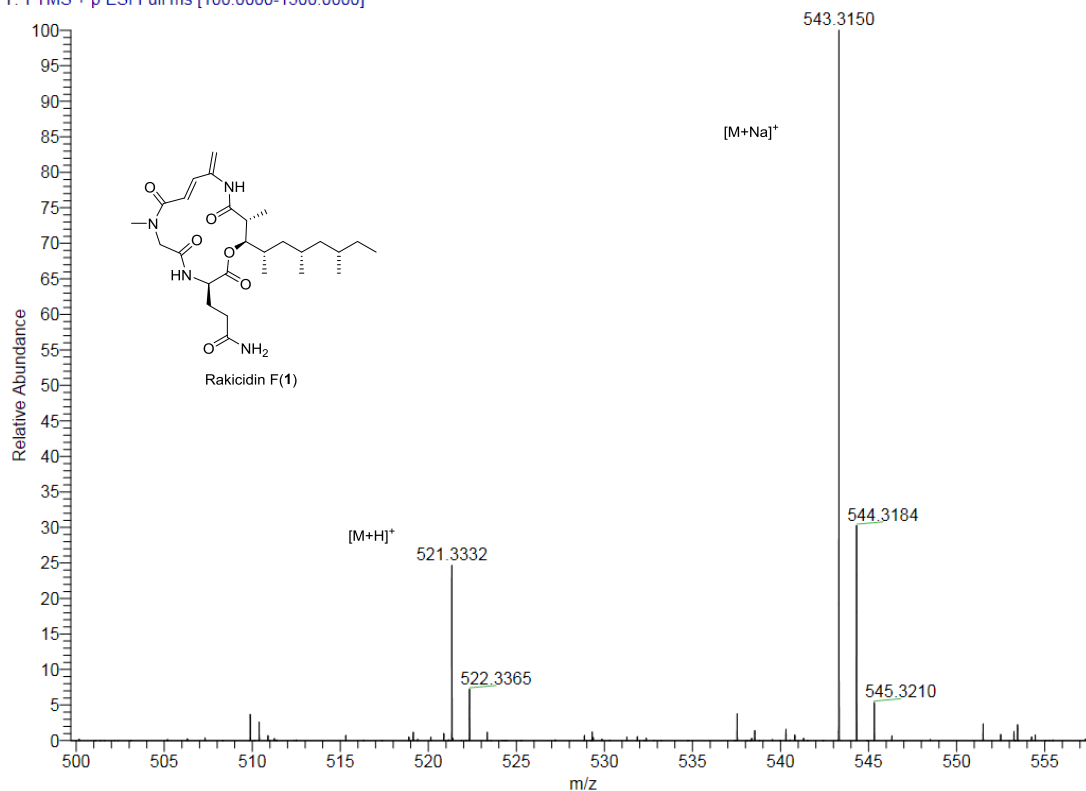

### IR Spectrum for Rakicidin F (1)

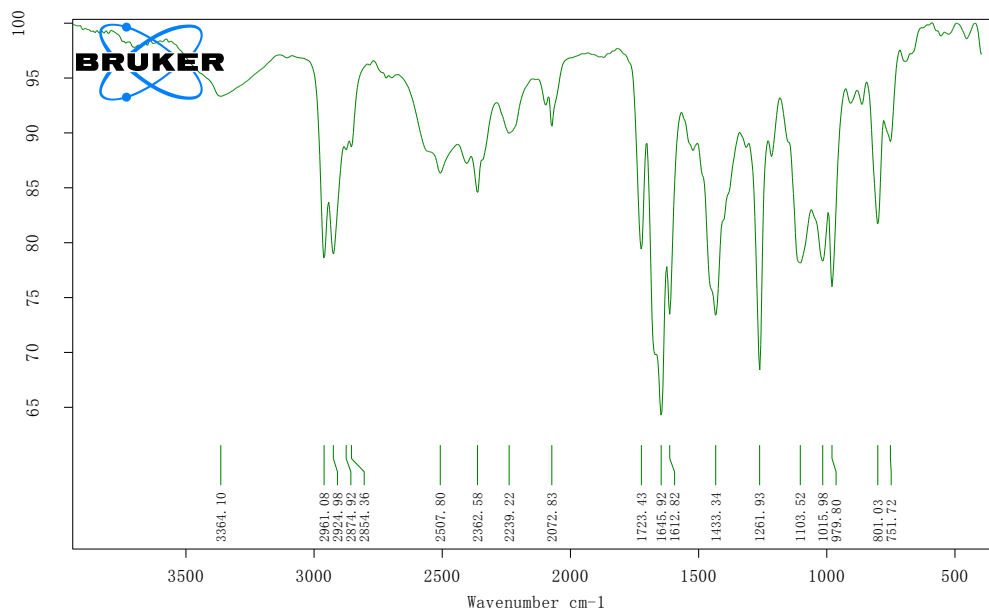

D:\原始数据\中红外原始数据\韩方智\RF\Rakicidin F.1

Rakicidin F

Instrument type and / or accessory

2022/3/2
